# Supplementary material for: Smartphone App Using Mindfulness Meditation for Women With Chronic Pelvic Pain (MEMPHIS): Protocol for a Randomized Feasibility Trial
Source: PubMed Central journal article supplement (PMC5789162; doi:10.2196/resprot.7720), 2018-01-15

Participant ID No.: \_\_\_\_\_

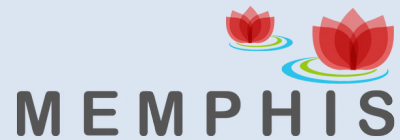

Feasibility study

## BASELINE QUESTIONNAIRE

### Confidential

*Dear Participant,*

*The aim of this questionnaire is find out your current health state and get to know how you feel about living with chronic pain before you participate in the MEMPHIS study. You don't have to answer*

*any question you are not comfortable with but we would appreciate you completing as much as possible.*

*Please read the questions carefully. If you have any difficulties with the questionnaire please contact the study team.*

**Please write date completed: DD / MMM / YYYY**



Participant ID No.: \_\_\_\_\_

## 2. Treatment of your pain

**What types of treatments have you tried for your pain in the last 6 months?**

(please indicate with a tick whether you have used the following:)

| Treatment name                                         | No                       | Yes                      | Treatment name                                     | No                       | Yes                      |
|--------------------------------------------------------|--------------------------|--------------------------|----------------------------------------------------|--------------------------|--------------------------|
| Acupuncture                                            | <input type="checkbox"/> | <input type="checkbox"/> | Massage                                            | <input type="checkbox"/> | <input type="checkbox"/> |
| Gabapentin                                             | <input type="checkbox"/> | <input type="checkbox"/> | Nutrition/diet                                     | <input type="checkbox"/> | <input type="checkbox"/> |
| Amitriptyline                                          | <input type="checkbox"/> | <input type="checkbox"/> | Codeine or Morphine type painkillers               | <input type="checkbox"/> | <input type="checkbox"/> |
| Biofeedback                                            | <input type="checkbox"/> | <input type="checkbox"/> | Nerve blocks                                       | <input type="checkbox"/> | <input type="checkbox"/> |
| Botox injection                                        | <input type="checkbox"/> | <input type="checkbox"/> | Over the counter medication                        | <input type="checkbox"/> | <input type="checkbox"/> |
| Contraceptive pills/patch/ ring                        | <input type="checkbox"/> | <input type="checkbox"/> | Physiotherapy                                      | <input type="checkbox"/> | <input type="checkbox"/> |
| Exercise, yoga or pilates                              | <input type="checkbox"/> | <input type="checkbox"/> | Psychological (talking) therapy                    | <input type="checkbox"/> | <input type="checkbox"/> |
| Injections to suppress ovaries (e.g. Prostag, Zoladex) | <input type="checkbox"/> | <input type="checkbox"/> | Transcutaneous Electrical Nerve Stimulation (TENS) | <input type="checkbox"/> | <input type="checkbox"/> |
| Herbal Medicine                                        | <input type="checkbox"/> | <input type="checkbox"/> | Surgery                                            | <input type="checkbox"/> | <input type="checkbox"/> |
| Meditation or relaxation exercises                     | <input type="checkbox"/> | <input type="checkbox"/> | Other - please state<br>_____                      | <input type="checkbox"/> | <input type="checkbox"/> |

**Are you using any pain treatment currently?**

Yes

No

Participant ID No.: \_\_\_\_\_

### 3. General Health

These questions ask for your views about your health. This information will help keep track of how you feel and how well you are able to do your usual activities.

Please answer every question by marking the answer as indicated. If you are unsure about how to answer a question, please give the best answer you can. When answering the question please assess how you felt in the last four weeks.

#### 3.1. In general, would you say your health is? (Please tick one box)

| <i>Excellent</i>         | <i>Very good</i>         | <i>Good</i>              | <i>Fair</i>              | <i>Poor</i>              |
|--------------------------|--------------------------|--------------------------|--------------------------|--------------------------|
| <input type="checkbox"/> | <input type="checkbox"/> | <input type="checkbox"/> | <input type="checkbox"/> | <input type="checkbox"/> |

#### 3.2. Compared to one year ago, how would you rate your health in general now? (Please tick one box)

| <i>Much better now than one year ago</i> | <i>Somewhat better now than one year ago</i> | <i>About the same</i>    | <i>Somewhat worse now than one year ago</i> | <i>Much worse than one year ago</i> |
|------------------------------------------|----------------------------------------------|--------------------------|---------------------------------------------|-------------------------------------|
| <input type="checkbox"/>                 | <input type="checkbox"/>                     | <input type="checkbox"/> | <input type="checkbox"/>                    | <input type="checkbox"/>            |

3.3 The following items are about activities you might do during a typical day. Does your health now limit you in these activities? If so, how much?

|                                                                                                                                          |                                                                                                                                           |
|------------------------------------------------------------------------------------------------------------------------------------------|-------------------------------------------------------------------------------------------------------------------------------------------|
| <b>a. Vigorous activities, such as running, lifting heavy objects, participating in strenuous sports</b><br>(Please tick <u>one</u> box) | <b>b. Moderate activities, such as moving a table, pushing a vacuum cleaner, bowling, or playing golf</b><br>(Please tick <u>one</u> box) |
| Yes, limited a lot <input type="checkbox"/>                                                                                              | Yes, limited a lot <input type="checkbox"/>                                                                                               |
| Yes, limited a little <input type="checkbox"/>                                                                                           | Yes, limited a little <input type="checkbox"/>                                                                                            |
| No, not limited at all <input type="checkbox"/>                                                                                          | No, not limited at all <input type="checkbox"/>                                                                                           |
| <b>c. Lifting or carrying groceries</b><br>(Please tick <u>one</u> box)                                                                  | <b>d. Climbing several flights of stairs</b><br>(Please tick <u>one</u> box)                                                              |
| Yes, limited a lot <input type="checkbox"/>                                                                                              | Yes, limited a lot <input type="checkbox"/>                                                                                               |
| Yes, limited a little <input type="checkbox"/>                                                                                           | Yes, limited a little <input type="checkbox"/>                                                                                            |
| No, not limited at all <input type="checkbox"/>                                                                                          | No, not limited at all <input type="checkbox"/>                                                                                           |

Participant ID No.: \_\_\_\_\_

### General Health continued...

|                                                                         |                                                                         |
|-------------------------------------------------------------------------|-------------------------------------------------------------------------|
| <b>e. Climbing one flight of stairs</b><br>(Please tick <u>one</u> box) | <b>f. Bending, kneeling or stooping</b><br>(Please tick <u>one</u> box) |
| Yes, limited a lot <input type="checkbox"/>                             | Yes, limited a lot <input type="checkbox"/>                             |
| Yes, limited a little <input type="checkbox"/>                          | Yes, limited a little <input type="checkbox"/>                          |
| No, not limited at all <input type="checkbox"/>                         | No, not limited at all <input type="checkbox"/>                         |
| <b>g. Walking more than a mile</b><br>(Please tick <u>one</u> box)      | <b>h. Walking several hundred yards</b><br>(Please tick <u>one</u> box) |
| Yes, limited a lot <input type="checkbox"/>                             | Yes, limited a lot <input type="checkbox"/>                             |
| Yes, limited a little <input type="checkbox"/>                          | Yes, limited a little <input type="checkbox"/>                          |
| No, not limited at all <input type="checkbox"/>                         | No, not limited at all <input type="checkbox"/>                         |
| <b>i. Walking one hundred yards</b><br>(Please tick <u>one</u> box)     | <b>j. Bathing or dressing yourself</b><br>(Please tick <u>one</u> box)  |
| Yes, limited a lot <input type="checkbox"/>                             | Yes, limited a lot <input type="checkbox"/>                             |
| Yes, limited a little <input type="checkbox"/>                          | Yes, limited a little <input type="checkbox"/>                          |
| No, not limited at all <input type="checkbox"/>                         | No, not limited at all <input type="checkbox"/>                         |

3.4 During the **past 4 weeks**, have you had any of the following problems with your work or other regular daily activities as a result of your physical health?

|                                                                                                          |                                                                              |
|----------------------------------------------------------------------------------------------------------|------------------------------------------------------------------------------|
| <b>a. Cut down the amount of time you spent on work or other activities</b> (Please tick <u>one</u> box) | <b>b. Accomplished less than you would like</b> (Please tick <u>one</u> box) |
| All of the time <input type="checkbox"/>                                                                 | All of the time <input type="checkbox"/>                                     |
| Most of the time <input type="checkbox"/>                                                                | Most of the time <input type="checkbox"/>                                    |
| Some of the time <input type="checkbox"/>                                                                | Some of the time <input type="checkbox"/>                                    |
| A little of the time <input type="checkbox"/>                                                            | A little of the time <input type="checkbox"/>                                |
| None of the time <input type="checkbox"/>                                                                | None of the time <input type="checkbox"/>                                    |

### General Health continued...

|                                                                                             |                                                                                                                                   |
|---------------------------------------------------------------------------------------------|-----------------------------------------------------------------------------------------------------------------------------------|
| <b>c. Were limited in the kind of work or other activities</b> (Please tick <u>one</u> box) | <b>d. Had difficulty performing the work or other activities (for example, it took extra effort)</b> (Please tick <u>one</u> box) |
| All of the time <input type="checkbox"/>                                                    | All of the time <input type="checkbox"/>                                                                                          |
| Most of the time <input type="checkbox"/>                                                   | Most of the time <input type="checkbox"/>                                                                                         |
| Some of the time <input type="checkbox"/>                                                   | Some of the time <input type="checkbox"/>                                                                                         |
| A little of the time <input type="checkbox"/>                                               | A little of the time <input type="checkbox"/>                                                                                     |

Participant ID No.: \_\_\_\_\_

None of the time

None of the time

3.5 During the **past 4 weeks**, have you had any of the following problems with your work or other regular daily activities as a result of any emotional problems (such as feeling depressed or anxious)?

**a. Cut down the amount of time you spent on work or other activities** (Please tick one box)

All of the time

Most of the time

Some of the time

A little of the time

None of the time

**b. Accomplished less than you would like**

(Please tick one box)

All of the time

Most of the time

Some of the time

A little of the time

None of the time

**c. Did work or other activities less carefully than usual** (Please tick one box)

All of the time

Most of the time

Some of the time

A little of the time

None of the time

Participant ID No.: \_\_\_\_\_

### General Health continued...

3.6. During the past 4 weeks, to what extent has your physical health or emotional problems interfered with your normal social activities with family, friends, neighbours or groups? (Please tick one box)

Not at all

Slightly

Moderately

Quite a bit

Extremely

3.7. How much bodily pain have you had during the past 4 weeks? (Please tick one box)

None

Very mild

Mild

Moderate

Severe

Very severe

3.8. During the past 4 weeks, how much did pain interfere with your normal work (including both work outside the home and housework)? (Please tick one box)

Not at all

A little bit

Moderately

Quite a bit

Extremely

3.9. These questions are about how you feel and how things have been with you during the past 4 weeks. For each question, please give the answer that comes closest to the way you have been feeling.

a. Did you feel full of life? (Please tick one box)

All of the time

Most of the time

Some of the time

A little of the time

None of the time

b. Have you been very nervous?

(Please tick one box)

All of the time

Most of the time

Some of the time

A little of the time

None of the time

c. Have you felt so down in the dumps that nothing could cheer you up? (Please tick one box)

All of the time

Most of the time

Some of the time

A little of the time

None of the time

d. Have you felt calm and peaceful?

(Please tick one box)

All of the time

Most of the time

Some of the time

A little of the time

None of the time

### General Health continued...

e. Did you have lots of energy?

(Please tick one box)

All of the time

f. Have you felt downhearted and depressed?

(Please tick one box)

All of the time

Participant ID No.: \_\_\_\_\_

Most of the time   
 Some of the time   
 A little of the time   
 None of the time

Most of the time   
 Some of the time   
 A little of the time   
 None of the time

**g. Did you feel worn out?** *(Please tick one box)*

All of the time   
 Most of the time   
 Some of the time   
 A little of the time   
 None of the time

**h. Have you been happy?** *(Please tick one box)*

All of the time   
 Most of the time   
 Some of the time   
 A little of the time   
 None of the time

**i. Did you feel tired?** *(Please tick one box)*

All of the time   
 Most of the time   
 Some of the time   
 A little of the time   
 None of the time

**3.10. During the past 4 weeks, how much of the time has your physical health or emotional problems interfered with your social activities (like visiting friends, relatives, etc.?)** *(Please tick one box)*

|                          |                          |                          |                             |                          |
|--------------------------|--------------------------|--------------------------|-----------------------------|--------------------------|
| <i>All of the time</i>   | <i>Most of the time</i>  | <i>Some of the time</i>  | <i>A little of the time</i> | <i>None of the time</i>  |
| <input type="checkbox"/> | <input type="checkbox"/> | <input type="checkbox"/> | <input type="checkbox"/>    | <input type="checkbox"/> |

**General Health continued...**

**3.11 How true or false is each of the following statements for you?**

**a. I seem to get sick a little easier than other people** *(Please tick one box)*

Definitely true   
 Mostly true   
 Don't know   
 Mostly false   
 Definitely false

**b. I am as healthy as anybody I know** *(Please tick one box)*

Definitely true   
 Mostly true   
 Don't know   
 Mostly false   
 Definitely false

**c. I expect my health to get worse** *(Please tick one box)*

**d. My health is excellent** *(Please tick one box)*



Participant ID No.: \_\_\_\_\_

|                  |                          |                  |                          |
|------------------|--------------------------|------------------|--------------------------|
| Definitely true  | <input type="checkbox"/> | Definitely true  | <input type="checkbox"/> |
| Mostly true      | <input type="checkbox"/> | Mostly true      | <input type="checkbox"/> |
| Don't know       | <input type="checkbox"/> | Don't know       | <input type="checkbox"/> |
| Mostly false     | <input type="checkbox"/> | Mostly false     | <input type="checkbox"/> |
| Definitely false | <input type="checkbox"/> | Definitely false | <input type="checkbox"/> |

Participant ID No.: \_\_\_\_\_

## 4. Your main symptoms

4.1. Choose one or two symptoms (physical or mental), which bother you the most.

- Write them on the lines.

- Now consider how bad each symptom is, over the last week, and score it by ticking the number.

|                                                |                                      |                                      |                                      |                                      |                                      |                                      |                                      |
|------------------------------------------------|--------------------------------------|--------------------------------------|--------------------------------------|--------------------------------------|--------------------------------------|--------------------------------------|--------------------------------------|
| <b>SYMPTOM 1</b><br><b>(specify):</b><br>_____ | <b>0</b><br><input type="checkbox"/> | <b>1</b><br><input type="checkbox"/> | <b>2</b><br><input type="checkbox"/> | <b>3</b><br><input type="checkbox"/> | <b>4</b><br><input type="checkbox"/> | <b>5</b><br><input type="checkbox"/> | <b>6</b><br><input type="checkbox"/> |
|                                                | As good as it could be               |                                      |                                      | As bad as it could be                |                                      |                                      |                                      |
| <b>SYMPTOM 2</b><br><b>(specify):</b><br>_____ | <b>0</b><br><input type="checkbox"/> | <b>1</b><br><input type="checkbox"/> | <b>2</b><br><input type="checkbox"/> | <b>3</b><br><input type="checkbox"/> | <b>4</b><br><input type="checkbox"/> | <b>5</b><br><input type="checkbox"/> | <b>6</b><br><input type="checkbox"/> |
|                                                | As good as it could be               |                                      |                                      | As bad as it could be                |                                      |                                      |                                      |

4.2. Now choose one activity (physical, social or mental) that is important to you, and that your problem makes difficult or prevents you doing. Score how bad it has been in the last week.

|                                     |                                      |                                      |                                      |                                      |                                      |                                      |                                      |
|-------------------------------------|--------------------------------------|--------------------------------------|--------------------------------------|--------------------------------------|--------------------------------------|--------------------------------------|--------------------------------------|
| <b>ACTIVITY (specify):</b><br>_____ | <b>0</b><br><input type="checkbox"/> | <b>1</b><br><input type="checkbox"/> | <b>2</b><br><input type="checkbox"/> | <b>3</b><br><input type="checkbox"/> | <b>4</b><br><input type="checkbox"/> | <b>5</b><br><input type="checkbox"/> | <b>6</b><br><input type="checkbox"/> |
|                                     | As good as it could be               |                                      |                                      | As bad as it could be                |                                      |                                      |                                      |

4.3. Lastly how would you rate your general feeling of wellbeing during the last week?

|                             |                                      |                                      |                                      |                                      |                                      |                                      |                                      |
|-----------------------------|--------------------------------------|--------------------------------------|--------------------------------------|--------------------------------------|--------------------------------------|--------------------------------------|--------------------------------------|
| <b>FEELING OF WELLBEING</b> | <b>0</b><br><input type="checkbox"/> | <b>1</b><br><input type="checkbox"/> | <b>2</b><br><input type="checkbox"/> | <b>3</b><br><input type="checkbox"/> | <b>4</b><br><input type="checkbox"/> | <b>5</b><br><input type="checkbox"/> | <b>6</b><br><input type="checkbox"/> |
|                             | As good as it could be               |                                      |                                      | As bad as it could be                |                                      |                                      |                                      |

4.4. How long have you had Symptom 1, either all the time or on and off? (Please circle)

0 - 4 weeks      5- 12 weeks      13 weeks - 1 year      Between 1 - 5 years      More than 5 years

4.5. Are you taking any medication FOR THIS PROBLEM? (Please circle)      YES / NO

IF YES

4.5. a. Please write in name of medication, and how much a day/week

Name: \_\_\_\_\_ Dose: \_\_\_\_\_ mg \_\_\_\_\_ day/week (please circle)

Name: \_\_\_\_\_ Dose: \_\_\_\_\_ mg \_\_\_\_\_ day/week (please circle)

Name: \_\_\_\_\_ Dose: \_\_\_\_\_ mg \_\_\_\_\_ day/week (please circle)

Name: \_\_\_\_\_ Dose: \_\_\_\_\_ mg \_\_\_\_\_ day/week (please circle)

4.5. b. Is cutting down this medication: (Please circle)

Participant ID No.: \_\_\_\_\_

*Not important*

*A bit important*

*Very important*

*Not applicable*

**IF NO (to Q.4.5):**

**4.5.c. Is avoiding medication for this problem: (Please circle)**

*Not important*

*a bit important*

*very important*

*not applicable*

Participant ID No.: \_\_\_\_\_

## 5. Mood

Please read each item and tick the reply which comes closest to how you have been feeling **in the past week**.

Don't take too long over your replies: your immediate response to each item will probably be more accurate than a long thought out response.

| 5.1. I feel tense or "wound up" (Please tick <u>one</u> box) | 5.2. I still enjoy the things I used to enjoy (Please tick <u>one</u> box) |
|--------------------------------------------------------------|----------------------------------------------------------------------------|
| Most of the time <input type="checkbox"/>                    | Definitely as much <input type="checkbox"/>                                |
| A lot of the time <input type="checkbox"/>                   | Not quite as much <input type="checkbox"/>                                 |
| From time to time, occasionally <input type="checkbox"/>     | Only a little <input type="checkbox"/>                                     |
| Not at all <input type="checkbox"/>                          | Hardly at all <input type="checkbox"/>                                     |

| 5.3. I get a sort of frightened feeling as if something awful is about to happen (Please tick <u>one</u> box) | 5.4. I can laugh and see the funny side of things (Please tick <u>one</u> box) |
|---------------------------------------------------------------------------------------------------------------|--------------------------------------------------------------------------------|
| Very definitely and quite badly <input type="checkbox"/>                                                      | As much as I always could <input type="checkbox"/>                             |
| Yes, but not too badly <input type="checkbox"/>                                                               | Not quite so much now <input type="checkbox"/>                                 |
| A little but it doesn't worry me <input type="checkbox"/>                                                     | Definitely not so much now <input type="checkbox"/>                            |
| Not at all <input type="checkbox"/>                                                                           | Not at all <input type="checkbox"/>                                            |

| 5.5. Worrying thoughts go through my mind (Please tick <u>one</u> box) | 5.6. I feel cheerful (Please tick <u>one</u> box) |
|------------------------------------------------------------------------|---------------------------------------------------|
| A great deal of the time <input type="checkbox"/>                      | Not at all <input type="checkbox"/>               |
| A lot of the time <input type="checkbox"/>                             | Not often <input type="checkbox"/>                |
| From time to time but not too often <input type="checkbox"/>           | Sometimes <input type="checkbox"/>                |
| Only occasionally <input type="checkbox"/>                             | Most of the time <input type="checkbox"/>         |

### Mood continued...

| 5.7. I can sit at ease and feel relaxed (Please tick <u>one</u> box) | 5.8. I feel as if I am slowed down (Please tick <u>one</u> box) |
|----------------------------------------------------------------------|-----------------------------------------------------------------|
| Definitely <input type="checkbox"/>                                  | Nearly all of the time <input type="checkbox"/>                 |
| Usually <input type="checkbox"/>                                     | Very often <input type="checkbox"/>                             |

Participant ID No.: \_\_\_\_\_

Not often

Sometimes

Not at all

Not at all

**5.9. I get a sort of frightened feeling like "butterflies" in the stomach** (Please tick one box)

Not at all

Occasionally

Quite often

Very often

**5.10. I have lost interest in my appearance** (Please tick one box)

Definitely

I don't take as much care as I should

I may not take quite as much care

I take just as much care as ever

**5.11. I feel restless as though I have to be on the move** (Please tick one box)

Very much indeed

Quite a lot

Not very much

Not at all

**5.12. I look forward with enjoyment to things** (Please tick one box)

As much as I ever did

Rather less than I used to

Definitely less than I used to

Hardly at all

**5.13. I get sudden feelings of panic** (Please tick one box)

Very often indeed

Quite often

Not very often

Not at all

**5.14. I can enjoy a good book or radio or TV programme** (Please tick one box)

Often

Sometimes

Not often

Very seldom

Participant ID No.: \_\_\_\_\_

## 6. Mental focus

Please respond to each item by marking one box per row.

| Items                                                                         | Rarely/<br>Not at All    | Sometimes                | Often                    | Almost<br>Always         |
|-------------------------------------------------------------------------------|--------------------------|--------------------------|--------------------------|--------------------------|
| 6.1 It is easy for me to concentrate on what I am doing.                      | <input type="checkbox"/> | <input type="checkbox"/> | <input type="checkbox"/> | <input type="checkbox"/> |
| 6.2 I am preoccupied by the future.                                           | <input type="checkbox"/> | <input type="checkbox"/> | <input type="checkbox"/> | <input type="checkbox"/> |
| 6.3 I can tolerate emotional pain                                             | <input type="checkbox"/> | <input type="checkbox"/> | <input type="checkbox"/> | <input type="checkbox"/> |
| 6.4 I can accept things I cannot change.                                      | <input type="checkbox"/> | <input type="checkbox"/> | <input type="checkbox"/> | <input type="checkbox"/> |
| 6.5 I can usually describe how I feel at the moment in considerable detail.   | <input type="checkbox"/> | <input type="checkbox"/> | <input type="checkbox"/> | <input type="checkbox"/> |
| 6.6 I am easily distracted.                                                   | <input type="checkbox"/> | <input type="checkbox"/> | <input type="checkbox"/> | <input type="checkbox"/> |
| 6.7 I am preoccupied by the past                                              | <input type="checkbox"/> | <input type="checkbox"/> | <input type="checkbox"/> | <input type="checkbox"/> |
| 6.8 It's easy for me to keep track of my thoughts and feelings.               | <input type="checkbox"/> | <input type="checkbox"/> | <input type="checkbox"/> | <input type="checkbox"/> |
| 6.9 I try to notice my thoughts without judging them                          | <input type="checkbox"/> | <input type="checkbox"/> | <input type="checkbox"/> | <input type="checkbox"/> |
| 6.10 I am able to accept the thoughts and feelings I have.                    | <input type="checkbox"/> | <input type="checkbox"/> | <input type="checkbox"/> | <input type="checkbox"/> |
| 6.11 I am able to focus on the present moment                                 | <input type="checkbox"/> | <input type="checkbox"/> | <input type="checkbox"/> | <input type="checkbox"/> |
| 6.12 I am able to pay close attention to one thing for a long period of time. | <input type="checkbox"/> | <input type="checkbox"/> | <input type="checkbox"/> | <input type="checkbox"/> |

Participant ID No.: \_\_\_\_\_

## 7. Pain acceptance

Below you will find a list of statements. Please rate the truth of each statement as it applies to you by ticking one response, where 0 is 'never true' and 6 is 'always true'.

**7.1. I am getting on with the business of living no matter what my level of pain is (Please tick one box)**

Never true

Always true

0

1

2

3

4

5

6

**7.2. Although things have changed, I am living a normal life despite my chronic pain**

(Please tick one box)

Never true

Always true

0

1

2

3

4

5

6

**7.3. I lead a full life even though I have chronic pain (Please tick one box)**

Never true

Always true

0

1

2

3

4

5

6

**7.4. Keeping my pain level under control takes first priority whenever I'm doing something**

(Please tick one box)

Never true

Always true

0

1

2

3

4

5

6

**7.5. Before I can make any serious plans, I have to get some control over my pain (Please tick one box)**

Never true

Always true

0

1

2

3

4

5

6

**Pain acceptance (continued...)**

**7.6. When my pain increases, I can still take care of my responsibilities (Please tick one box)**







Participant ID No.: \_\_\_\_\_

## 9. Confidence

Please indicate how **confident** you are that you can do the following things **at present**, despite the pain, where 0 is 'not at all confident' and 6 is 'completely confident'

\*\* Remember, these questions are not asking whether or not you have been doing these things, but rather how confident you are that you could do them **at present**, despite the pain

### 9.1. I can enjoy things, despite the pain (Please tick one box)

Not confident

completely confident

0

1

2

3

4

5

6

### 9.2. I can do most household chores (e.g. tidying up, washing dishes etc), despite the pain

(Please tick one box)

Not confident

completely confident

0

1

2

3

4

5

6

### 9.3. I can socialise with my friends or family members as often as I used to, despite the pain

(Please tick one box)

Not confident

completely confident

0

1

2

3

4

5

6

### 9.4. I can cope with my pain in most situations (Please tick one box)

Not confident

completely confident

0

1

2

3

4

5

6

### 9.5. I can do some form of work, despite the pain ('work' includes housework, paid and unpaid work)

(Please tick one box)

Not confident

completely confident

0

1

2

3

4

5

6

### Confidence (continued...)

### 9.6. I can still do many of the things I enjoy doing, such as hobbies or leisure activity, despite the pain

(Please tick one box)



Participant ID No.: \_\_\_\_\_

## 10. Intimate life

### Satisfaction

- 10.1** During the past 4 weeks, how satisfied were you with the frequency of your sexual activity (with or without a partner)?
- Very satisfied
  - Somewhat satisfied
  - Neither satisfied nor dissatisfied
  - Somewhat dissatisfied
  - Very dissatisfied

- 10.2** During the past 4 weeks, how satisfied in general have you been with your ability to have and enjoy sex with/without a partner?
- Very satisfied
  - Somewhat satisfied
  - Neither satisfied nor dissatisfied
  - Somewhat dissatisfied
  - Very dissatisfied
  - I don't have a partner/
  - I don't have sex without a partner

### Orgasm

- 10.3** During the past 4 weeks, when you had sexual activity, how much of the time did you experience orgasm?
- Never
  - Rarely
  - Sometimes
  - Most of the time
  - All of the time
  - I did not have sexual activity

- 10.4** During the past 4 weeks, when you had sexual activity, how much of the time did you feel satisfied after sexual activity?
- Never
  - Rarely
  - Sometimes
  - Most of the time
  - All of the time
  - I did not have sexual activity

Participant ID No.: \_\_\_\_\_

***Intimate life (continued...)***

**Orgasm**

- 10.5 During the past 4 weeks, when you experienced orgasm, how strong or intense was the orgasm on average?
- Did not experience any orgasms
  - Mild
  - Moderate
  - Strong

- 10.6 During the past 4 weeks, how much of a problem was difficulty in having an orgasm?
- Not a problem
  - Little of a problem
  - Somewhat of a problem
  - Very much of a problem
  - I did not have sexual activity

**Desire**

- 10.7 During the past 4 weeks, how much of a problem was lack of sexual interest?
- Not a problem
  - Little of a problem
  - Somewhat of a problem
  - Very much of a problem
  - I did not have sexual activity

- 10.8 During the past 4 weeks, how often did you desire sex (with or without a partner?)
- Never
  - Once or twice
  - 3-4 times
  - 5-6 times
  - More than 6 times

- 10.9 During the past 4 weeks, how much of a problem was inability to relax and enjoy sex?
- Not a problem
  - Little of a problem
  - Somewhat of a problem
  - Very much of a problem
  - I did not have sexual activity

***Intimate life (continued...)***

Participant ID No.: \_\_\_\_\_

**Pelvic problem interference**

- 10.10** During the past 4 weeks, to what extent has your bleeding interfered with your normal or regular sexual activity (with or without a partner)?
- Not at all
  - Slightly
  - Moderately
  - Quite a bit
  - Extremely

- 
- 10.11** During the past 4 weeks, to what extent has your pelvic pain or discomfort interfered with your normal or regular sexual activity (with or without a partner)?
- Not at all
  - Slightly
  - Moderately
  - Quite a bit
  - Extremely

- 
- 10.12** During the past 4 weeks, to what extent have your pelvic problems overall interfered with your normal or regular sexual activity (with or without a partner)?
- Not at all
  - Slightly
  - Moderately
  - Quite a bit
  - Extremely
-

Participant ID No.: \_\_\_\_\_

## 11. Additional details

11.1. Which group best describes your ethnic group? (please tick one box only)

|                    |                          |                    |                          |
|--------------------|--------------------------|--------------------|--------------------------|
| White              | <input type="checkbox"/> | Black              | <input type="checkbox"/> |
| Central Asian      | <input type="checkbox"/> | Middle Eastern     | <input type="checkbox"/> |
| Southern Asian     | <input type="checkbox"/> | Mixed              | <input type="checkbox"/> |
| Other ethnic group | <input type="checkbox"/> | Do not wish to say | <input type="checkbox"/> |

In order to understand better the mechanism you developed to cope with persistent pain, please answer below questions. The questionnaire is confidential and your answers will be used only for research purposes.

|                                                                              |                                                                 |                             |
|------------------------------------------------------------------------------|-----------------------------------------------------------------|-----------------------------|
| <b>11.2 Do you smoke?</b>                                                    | Yes <input type="checkbox"/>                                    | No <input type="checkbox"/> |
| If <u>yes</u> , how many cigarettes per week? _____                          |                                                                 |                             |
| <b>11.3. Do you drink alcohol?</b>                                           | Yes <input type="checkbox"/>                                    | No <input type="checkbox"/> |
| If <u>yes</u> , how many units of alcohol do you drink per week? _____ units |                                                                 |                             |
| <b>Units</b>                                                                 | An average pint of beer/ cider (5%) = 3 units                   |                             |
| <b>Guide</b>                                                                 | A 250ml glass of wine (11%) = 3 units                           |                             |
|                                                                              | A single measure (25ml) of spirits (e.g. vodka or gin) = 1 unit |                             |

**THANK YOU FOR FILLING IN THE QUESTIONNAIRE**

Participant ID No.: \_\_\_\_\_

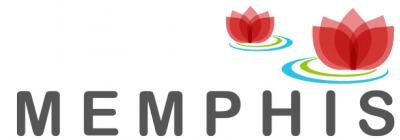

## FOLLOW-UP QUESTIONNAIRE

### Confidential

*Dear Participant,*

*The aim of this questionnaire is find out your current health state and get to know how you feel about living with chronic pain before you participate in the MEMPHIS study. You don't have to answer*

*any question you are not comfortable with but we would appreciate you completing as much as possible.*

*Please read the questions carefully. If you have any difficulties with the questionnaire please contact the study team.*

**Please write date completed: DD / MMM / YYYY**



Participant ID No.: \_\_\_\_\_

## 1. General Health

These questions ask for your views about your health. This information will help keep track of how you feel and how well you are able to do your usual activities.

Please answer every question by marking the answer as indicated. If you are unsure about how to answer a question, please give the best answer you can. When answering the question please assess how you felt in the last four weeks.

### 1.1. In general, would you say your health is? (Please tick one box)

| <i>Excellent</i>         | <i>Very good</i>         | <i>Good</i>              | <i>Fair</i>              | <i>Poor</i>              |
|--------------------------|--------------------------|--------------------------|--------------------------|--------------------------|
| <input type="checkbox"/> | <input type="checkbox"/> | <input type="checkbox"/> | <input type="checkbox"/> | <input type="checkbox"/> |

### 1.2. Compared to one year ago, how would you rate your health in general now? (Please tick one box)

| <i>Much better now than one year ago</i> | <i>Somewhat better now than one year ago</i> | <i>About the same</i>    | <i>Somewhat worse now than one year ago</i> | <i>Much worse than one year ago</i> |
|------------------------------------------|----------------------------------------------|--------------------------|---------------------------------------------|-------------------------------------|
| <input type="checkbox"/>                 | <input type="checkbox"/>                     | <input type="checkbox"/> | <input type="checkbox"/>                    | <input type="checkbox"/>            |

1.3 The following items are about activities you might do during a typical day. Does your health now limit you in these activities? If so how much?

|                                                                                                                                          |                                                                                                                                           |
|------------------------------------------------------------------------------------------------------------------------------------------|-------------------------------------------------------------------------------------------------------------------------------------------|
| <b>a. Vigorous activities, such as running, lifting heavy objects, participating in strenuous sports</b><br>(Please tick <u>one</u> box) | <b>b. Moderate activities, such as moving a table, pushing a vacuum cleaner, bowling, or playing golf</b><br>(Please tick <u>one</u> box) |
| Yes, limited a lot <input type="checkbox"/>                                                                                              | Yes, limited a lot <input type="checkbox"/>                                                                                               |
| Yes, limited a little <input type="checkbox"/>                                                                                           | Yes, limited a little <input type="checkbox"/>                                                                                            |
| No, not limited at all <input type="checkbox"/>                                                                                          | No, not limited at all <input type="checkbox"/>                                                                                           |
| <b>c. Lifting or carrying groceries</b><br>(Please tick <u>one</u> box)                                                                  | <b>d. Climbing several flights of stairs</b><br>(Please tick <u>one</u> box)                                                              |
| Yes, limited a lot <input type="checkbox"/>                                                                                              | Yes, limited a lot <input type="checkbox"/>                                                                                               |
| Yes, limited a little <input type="checkbox"/>                                                                                           | Yes, limited a little <input type="checkbox"/>                                                                                            |
| No, not limited at all <input type="checkbox"/>                                                                                          | No, not limited at all <input type="checkbox"/>                                                                                           |

Participant ID No.: \_\_\_\_\_

**General Health continued...**

|                                                                                |                                                                                |
|--------------------------------------------------------------------------------|--------------------------------------------------------------------------------|
| <b>e. Climbing one flight of stairs</b><br><i>(Please tick <u>one</u> box)</i> | <b>f. Bending, kneeling or stooping</b><br><i>(Please tick <u>one</u> box)</i> |
| Yes, limited a lot <input type="checkbox"/>                                    | Yes, limited a lot <input type="checkbox"/>                                    |
| Yes, limited a little <input type="checkbox"/>                                 | Yes, limited a little <input type="checkbox"/>                                 |
| No, not limited at all <input type="checkbox"/>                                | No, not limited at all <input type="checkbox"/>                                |
| <b>g. Walking more than a mile</b><br><i>(Please tick <u>one</u> box)</i>      | <b>h. Walking several hundred yards</b><br><i>(Please tick <u>one</u> box)</i> |
| Yes, limited a lot <input type="checkbox"/>                                    | Yes, limited a lot <input type="checkbox"/>                                    |
| Yes, limited a little <input type="checkbox"/>                                 | Yes, limited a little <input type="checkbox"/>                                 |
| No, not limited at all <input type="checkbox"/>                                | No, not limited at all <input type="checkbox"/>                                |
| <b>i. Walking one hundred yards</b><br><i>(Please tick <u>one</u> box)</i>     | <b>j. Bathing or dressing yourself</b><br><i>(Please tick <u>one</u> box)</i>  |
| Yes, limited a lot <input type="checkbox"/>                                    | Yes, limited a lot <input type="checkbox"/>                                    |
| Yes, limited a little <input type="checkbox"/>                                 | Yes, limited a little <input type="checkbox"/>                                 |
| No, not limited at all <input type="checkbox"/>                                | No, not limited at all <input type="checkbox"/>                                |

1.4 During the **past 4 weeks**, have you had any of the following problems with your work or other regular daily activities as a result of your physical health?

|                                                                                                                 |                                                                                     |
|-----------------------------------------------------------------------------------------------------------------|-------------------------------------------------------------------------------------|
| <b>a. Cut down the amount of time you spent on work or other activities</b> <i>(Please tick <u>one</u> box)</i> | <b>b. Accomplished less than you would like</b> <i>(Please tick <u>one</u> box)</i> |
| All of the time <input type="checkbox"/>                                                                        | All of the time <input type="checkbox"/>                                            |
| Most of the time <input type="checkbox"/>                                                                       | Most of the time <input type="checkbox"/>                                           |
| Some of the time <input type="checkbox"/>                                                                       | Some of the time <input type="checkbox"/>                                           |
| A little of the time <input type="checkbox"/>                                                                   | A little of the time <input type="checkbox"/>                                       |
| None of the time <input type="checkbox"/>                                                                       | None of the time <input type="checkbox"/>                                           |

**General Health continued...**

|                                                                                                    |                                                                                                                                          |
|----------------------------------------------------------------------------------------------------|------------------------------------------------------------------------------------------------------------------------------------------|
| <b>c. Were limited in the kind of work or other activities</b> <i>(Please tick <u>one</u> box)</i> | <b>d. Had difficulty performing the work or other activities (for example, it took extra effort)</b> <i>(Please tick <u>one</u> box)</i> |
| All of the time <input type="checkbox"/>                                                           | All of the time <input type="checkbox"/>                                                                                                 |
| Most of the time <input type="checkbox"/>                                                          | Most of the time <input type="checkbox"/>                                                                                                |
| Some of the time <input type="checkbox"/>                                                          | Some of the time <input type="checkbox"/>                                                                                                |
| A little of the time <input type="checkbox"/>                                                      | A little of the time <input type="checkbox"/>                                                                                            |

Participant ID No.: \_\_\_\_\_

None of the time

None of the time

1.5 During the **past 4 weeks**, have you had any of the following problems with your work or other regular daily activities as a result of any emotional problems (such as feeling depressed or anxious)?

**a. Cut down the amount of time you spent on work or other activities** (Please tick one box)

All of the time

Most of the time

Some of the time

A little of the time

None of the time

**b. Accomplished less than you would like**

(Please tick one box)

All of the time

Most of the time

Some of the time

A little of the time

None of the time

**c. Did work or other activities less carefully than usual** (Please tick one box)

All of the time

Most of the time

Some of the time

A little of the time

None of the time

Participant ID No.: \_\_\_\_\_

### General Health continued...

**1.6. During the past 4 weeks, to what extent has your physical health or emotional problems interfered with your normal social activities with family, friends, neighbours or groups? (Please tick one box)**

*Not at all*

*Slightly*

*Moderately*

*Quite a bit*

*Extremely*

**1.7. How much bodily pain have you had during the past 4 weeks? (Please tick one box)**

*None*

*Very mild*

*Mild*

*Moderate*

*Severe*

*Very severe*

**1.8. During the past 4 weeks, how much did pain interfere with your normal work (including both work outside the home and housework)? (Please tick one box)**

*Not at all*

*A little bit*

*Moderately*

*Quite a bit*

*Extremely*

**1.9. These questions are about how you feel and how things have been with you during the past 4 weeks. For each question, please give the answer that comes closest to the way you have been feeling.**

**a. Did you feel full of life? (Please tick one box)**

All of the time

Most of the time

Some of the time

A little of the time

None of the time

**b. Have you been very nervous?**

(Please tick one box)

All of the time

Most of the time

Some of the time

A little of the time

None of the time

**c. Have you felt so down in the dumps that nothing could cheer you up? (Please tick one box)**

All of the time

Most of the time

Some of the time

A little of the time

None of the time

**d. Have you felt calm and peaceful?**

(Please tick one box)

All of the time

Most of the time

Some of the time

A little of the time

None of the time

### General Health continued...

**e. Did you have lots of energy?**

(Please tick one box)

**f. Have you felt downhearted and depressed?**

(Please tick one box)

Participant ID No.: \_\_\_\_\_

|                                                               |                          |                                                             |                          |
|---------------------------------------------------------------|--------------------------|-------------------------------------------------------------|--------------------------|
| All of the time                                               | <input type="checkbox"/> | All of the time                                             | <input type="checkbox"/> |
| Most of the time                                              | <input type="checkbox"/> | Most of the time                                            | <input type="checkbox"/> |
| Some of the time                                              | <input type="checkbox"/> | Some of the time                                            | <input type="checkbox"/> |
| A little of the time                                          | <input type="checkbox"/> | A little of the time                                        | <input type="checkbox"/> |
| None of the time                                              | <input type="checkbox"/> | None of the time                                            | <input type="checkbox"/> |
| <b>g. Did you feel worn out? (Please tick <u>one</u> box)</b> |                          | <b>h. Have you been happy? (Please tick <u>one</u> box)</b> |                          |
| All of the time                                               | <input type="checkbox"/> | All of the time                                             | <input type="checkbox"/> |
| Most of the time                                              | <input type="checkbox"/> | Most of the time                                            | <input type="checkbox"/> |
| Some of the time                                              | <input type="checkbox"/> | Some of the time                                            | <input type="checkbox"/> |
| A little of the time                                          | <input type="checkbox"/> | A little of the time                                        | <input type="checkbox"/> |
| None of the time                                              | <input type="checkbox"/> | None of the time                                            | <input type="checkbox"/> |
| <b>i. Did you feel tired? (Please tick <u>one</u> box)</b>    |                          |                                                             |                          |
| All of the time                                               | <input type="checkbox"/> |                                                             |                          |
| Most of the time                                              | <input type="checkbox"/> |                                                             |                          |
| Some of the time                                              | <input type="checkbox"/> |                                                             |                          |
| A little of the time                                          | <input type="checkbox"/> |                                                             |                          |
| None of the time                                              | <input type="checkbox"/> |                                                             |                          |

**1.10. During the past 4 weeks, how much of the time has your physical health or emotional problems interfered with your social activities (like visiting friends, relatives, etc.?) (Please tick one box)**

|                          |                          |                          |                             |                          |
|--------------------------|--------------------------|--------------------------|-----------------------------|--------------------------|
| <i>All of the time</i>   | <i>Most of the time</i>  | <i>Some of the time</i>  | <i>A little of the time</i> | <i>None of the time</i>  |
| <input type="checkbox"/> | <input type="checkbox"/> | <input type="checkbox"/> | <input type="checkbox"/>    | <input type="checkbox"/> |

Participant ID No.: \_\_\_\_\_

## General Health continued...

1.11 How true or false is each of the following statements for you?

| <b>a. I seem to get sick a little easier than other people</b><br><i>(Please tick <u>one</u> box)</i> | <b>b. I am as healthy as anybody I know</b><br><i>(Please tick <u>one</u> box)</i> |
|-------------------------------------------------------------------------------------------------------|------------------------------------------------------------------------------------|
| Definitely true <input type="checkbox"/>                                                              | Definitely true <input type="checkbox"/>                                           |
| Mostly true <input type="checkbox"/>                                                                  | Mostly true <input type="checkbox"/>                                               |
| Don't know <input type="checkbox"/>                                                                   | Don't know <input type="checkbox"/>                                                |
| Mostly false <input type="checkbox"/>                                                                 | Mostly false <input type="checkbox"/>                                              |
| Definitely false <input type="checkbox"/>                                                             | Definitely false <input type="checkbox"/>                                          |
| <b>c. I expect my health to get worse</b><br><i>(Please tick <u>one</u> box)</i>                      | <b>d. My health is excellent</b><br><i>(Please tick <u>one</u> box)</i>            |
| Definitely true <input type="checkbox"/>                                                              | Definitely true <input type="checkbox"/>                                           |
| Mostly true <input type="checkbox"/>                                                                  | Mostly true <input type="checkbox"/>                                               |
| Don't know <input type="checkbox"/>                                                                   | Don't know <input type="checkbox"/>                                                |
| Mostly false <input type="checkbox"/>                                                                 | Mostly false <input type="checkbox"/>                                              |
| Definitely false <input type="checkbox"/>                                                             | Definitely false <input type="checkbox"/>                                          |

Participant ID No.: \_\_\_\_\_

## 2. Your main symptoms

**2.1. Please circle the number to show how severe your problem has been IN THE LAST WEEK. This should be YOUR opinion, no-one else's! Please use the same symptoms and activity as on the baseline questionnaire.**

|                                                |                                      |                                      |                                      |                                      |                                      |                                      |                                      |
|------------------------------------------------|--------------------------------------|--------------------------------------|--------------------------------------|--------------------------------------|--------------------------------------|--------------------------------------|--------------------------------------|
| <b>SYMPTOM 1</b><br><b>(specify):</b><br>_____ | <b>0</b><br><input type="checkbox"/> | <b>1</b><br><input type="checkbox"/> | <b>2</b><br><input type="checkbox"/> | <b>3</b><br><input type="checkbox"/> | <b>4</b><br><input type="checkbox"/> | <b>5</b><br><input type="checkbox"/> | <b>6</b><br><input type="checkbox"/> |
|                                                | As good as it could be               |                                      |                                      | As bad as it could be                |                                      |                                      |                                      |

|                                                |                                      |                                      |                                      |                                      |                                      |                                      |                                      |
|------------------------------------------------|--------------------------------------|--------------------------------------|--------------------------------------|--------------------------------------|--------------------------------------|--------------------------------------|--------------------------------------|
| <b>SYMPTOM 2</b><br><b>(specify):</b><br>_____ | <b>0</b><br><input type="checkbox"/> | <b>1</b><br><input type="checkbox"/> | <b>2</b><br><input type="checkbox"/> | <b>3</b><br><input type="checkbox"/> | <b>4</b><br><input type="checkbox"/> | <b>5</b><br><input type="checkbox"/> | <b>6</b><br><input type="checkbox"/> |
|                                                | As good as it could be               |                                      |                                      | As bad as it could be                |                                      |                                      |                                      |

|                                     |                                      |                                      |                                      |                                      |                                      |                                      |                                      |
|-------------------------------------|--------------------------------------|--------------------------------------|--------------------------------------|--------------------------------------|--------------------------------------|--------------------------------------|--------------------------------------|
| <b>ACTIVITY (specify):</b><br>_____ | <b>0</b><br><input type="checkbox"/> | <b>1</b><br><input type="checkbox"/> | <b>2</b><br><input type="checkbox"/> | <b>3</b><br><input type="checkbox"/> | <b>4</b><br><input type="checkbox"/> | <b>5</b><br><input type="checkbox"/> | <b>6</b><br><input type="checkbox"/> |
|                                     | As good as it could be               |                                      |                                      | As bad as it could be                |                                      |                                      |                                      |

**2.2. How would you rate your general feeling of wellbeing during the last week?**

|                             |                                      |                                      |                                      |                                      |                                      |                                      |                                      |
|-----------------------------|--------------------------------------|--------------------------------------|--------------------------------------|--------------------------------------|--------------------------------------|--------------------------------------|--------------------------------------|
| <b>FEELING OF WELLBEING</b> | <b>0</b><br><input type="checkbox"/> | <b>1</b><br><input type="checkbox"/> | <b>2</b><br><input type="checkbox"/> | <b>3</b><br><input type="checkbox"/> | <b>4</b><br><input type="checkbox"/> | <b>5</b><br><input type="checkbox"/> | <b>6</b><br><input type="checkbox"/> |
|                             | As good as it could be               |                                      |                                      | As bad as it could be                |                                      |                                      |                                      |

**2.3. If an important new symptom has appeared please describe it and mark how bad it is below.**

|                                                |                                      |                                      |                                      |                                      |                                      |                                      |                                      |
|------------------------------------------------|--------------------------------------|--------------------------------------|--------------------------------------|--------------------------------------|--------------------------------------|--------------------------------------|--------------------------------------|
| <b>SYMPTOM 3</b><br><b>(specify):</b><br>_____ | <b>0</b><br><input type="checkbox"/> | <b>1</b><br><input type="checkbox"/> | <b>2</b><br><input type="checkbox"/> | <b>3</b><br><input type="checkbox"/> | <b>4</b><br><input type="checkbox"/> | <b>5</b><br><input type="checkbox"/> | <b>6</b><br><input type="checkbox"/> |
|                                                | As good as it could be               |                                      |                                      | As bad as it could be                |                                      |                                      |                                      |

The treatment you are receiving may not be the only thing affecting your problem. If there is anything else that you think is important, such as changes you have made yourself, or other things happening in your life, please write it here (write overleaf if you need more space):

**2.4. Are you taking any medication FOR THIS PROBLEM? (Please circle)**

**YES / NO**

Participant ID No.: \_\_\_\_\_

IF YES

2.5. a. Please write in name of medication, and how much a day/week

Name: \_\_\_\_\_ Dose: \_\_\_\_\_ mg \_\_\_\_\_ day/week (please circle)

Name: \_\_\_\_\_ Dose: \_\_\_\_\_ mg \_\_\_\_\_ day/week (please circle)

Name: \_\_\_\_\_ Dose: \_\_\_\_\_ mg \_\_\_\_\_ day/week (please circle)

Name: \_\_\_\_\_ Dose: \_\_\_\_\_ mg \_\_\_\_\_ day/week (please circle)

---



Participant ID No.: \_\_\_\_\_

### 3. Mood

Please read each item and tick the reply which comes closest to how you have been feeling **in the past week**.

Don't take too long over your replies: your immediate response to each item will probably be more accurate than a long thought out response.

| 3.1. I feel tense or "wound up" (Please tick <u>one</u> box) | 3.2. I still enjoy the things I used to enjoy (Please tick <u>one</u> box) |
|--------------------------------------------------------------|----------------------------------------------------------------------------|
| Most of the time <input type="checkbox"/>                    | Definitely as much <input type="checkbox"/>                                |
| A lot of the time <input type="checkbox"/>                   | Not quite as much <input type="checkbox"/>                                 |
| From time to time, occasionally <input type="checkbox"/>     | Only a little <input type="checkbox"/>                                     |
| Not at all <input type="checkbox"/>                          | Hardly at all <input type="checkbox"/>                                     |

| 3.3. I get a sort of frightened feeling as if something awful is about to happen (Please tick <u>one</u> box) | 3.4. I can laugh and see the funny side of things (Please tick <u>one</u> box) |
|---------------------------------------------------------------------------------------------------------------|--------------------------------------------------------------------------------|
| Very definitely and quite badly <input type="checkbox"/>                                                      | As much as I always could <input type="checkbox"/>                             |
| Yes, but not too badly <input type="checkbox"/>                                                               | Not quite so much now <input type="checkbox"/>                                 |
| A little but it doesn't worry me <input type="checkbox"/>                                                     | Definitely not so much now <input type="checkbox"/>                            |
| Not at all <input type="checkbox"/>                                                                           | Not at all <input type="checkbox"/>                                            |

| 3.5. Worrying thoughts go through my mind (Please tick <u>one</u> box) | 3.6. I feel cheerful (Please tick <u>one</u> box) |
|------------------------------------------------------------------------|---------------------------------------------------|
| A great deal of the time <input type="checkbox"/>                      | Not at all <input type="checkbox"/>               |
| A lot of the time <input type="checkbox"/>                             | Not often <input type="checkbox"/>                |
| From time to time but not too often <input type="checkbox"/>           | Sometimes <input type="checkbox"/>                |
| Only occasionally <input type="checkbox"/>                             | Most of the time <input type="checkbox"/>         |

Participant ID No.: \_\_\_\_\_

**Mood continued...**

| <b>3.7. I can sit at ease and feel relaxed</b><br><i>(Please tick <u>one</u> box)</i> | <b>3.8. I feel as if I am slowed down</b><br><i>(Please tick <u>one</u> box)</i> |
|---------------------------------------------------------------------------------------|----------------------------------------------------------------------------------|
| Definitely <input type="checkbox"/>                                                   | Nearly all of the time <input type="checkbox"/>                                  |
| Usually <input type="checkbox"/>                                                      | Very often <input type="checkbox"/>                                              |
| Not often <input type="checkbox"/>                                                    | Sometimes <input type="checkbox"/>                                               |
| Not at all <input type="checkbox"/>                                                   | Not at all <input type="checkbox"/>                                              |

| <b>3.9. I get a sort of frightened feeling like "butterflies" in the stomach</b><br><i>(Please tick <u>one</u> box)</i> | <b>3.10. I have lost interest in my appearance</b><br><i>(Please tick <u>one</u> box)</i> |
|-------------------------------------------------------------------------------------------------------------------------|-------------------------------------------------------------------------------------------|
| Not at all <input type="checkbox"/>                                                                                     | Definitely <input type="checkbox"/>                                                       |
| Occasionally <input type="checkbox"/>                                                                                   | I don't take as much care as I should <input type="checkbox"/>                            |
| Quite often <input type="checkbox"/>                                                                                    | I may not take quite as much care <input type="checkbox"/>                                |
| Very often <input type="checkbox"/>                                                                                     | I take just as much care as ever <input type="checkbox"/>                                 |

| <b>3.11. I feel restless as though I have to be on the move</b><br><i>(Please tick <u>one</u> box)</i> | <b>3.12. I look forward with enjoyment to things</b><br><i>(Please tick <u>one</u> box)</i> |
|--------------------------------------------------------------------------------------------------------|---------------------------------------------------------------------------------------------|
| Very much indeed <input type="checkbox"/>                                                              | As much as I ever did <input type="checkbox"/>                                              |
| Quite a lot <input type="checkbox"/>                                                                   | Rather less than I used to <input type="checkbox"/>                                         |
| Not very much <input type="checkbox"/>                                                                 | Definitely less than I used to <input type="checkbox"/>                                     |
| Not at all <input type="checkbox"/>                                                                    | Hardly at all <input type="checkbox"/>                                                      |

| <b>3.13. I get sudden feelings of panic</b><br><i>(Please tick <u>one</u> box)</i> | <b>3.14. I can enjoy a good book or radio or TV programme</b><br><i>(Please tick <u>one</u> box)</i> |
|------------------------------------------------------------------------------------|------------------------------------------------------------------------------------------------------|
| Very often indeed <input type="checkbox"/>                                         | Often <input type="checkbox"/>                                                                       |
| Quite often <input type="checkbox"/>                                               | Sometimes <input type="checkbox"/>                                                                   |
| Not very often <input type="checkbox"/>                                            | Not often <input type="checkbox"/>                                                                   |
| Not at all <input type="checkbox"/>                                                | Very seldom <input type="checkbox"/>                                                                 |

Participant ID No.: \_\_\_\_\_

## 4. Mental focus

Please respond to each item by marking one box per row.

| Items                                                                         | Rarely/<br>Not at All    | Sometimes                | Often                    | Almost<br>Always         |
|-------------------------------------------------------------------------------|--------------------------|--------------------------|--------------------------|--------------------------|
| 4.1 It is easy for me to concentrate on what I am doing.                      | <input type="checkbox"/> | <input type="checkbox"/> | <input type="checkbox"/> | <input type="checkbox"/> |
| 4.2 I am preoccupied by the future.                                           | <input type="checkbox"/> | <input type="checkbox"/> | <input type="checkbox"/> | <input type="checkbox"/> |
| 4.3 I can tolerate emotional pain                                             | <input type="checkbox"/> | <input type="checkbox"/> | <input type="checkbox"/> | <input type="checkbox"/> |
| 4.4 I can accept things I cannot change.                                      | <input type="checkbox"/> | <input type="checkbox"/> | <input type="checkbox"/> | <input type="checkbox"/> |
| 4.5 I can usually describe how I feel at the moment in considerable detail.   | <input type="checkbox"/> | <input type="checkbox"/> | <input type="checkbox"/> | <input type="checkbox"/> |
| 4.6 I am easily distracted.                                                   | <input type="checkbox"/> | <input type="checkbox"/> | <input type="checkbox"/> | <input type="checkbox"/> |
| 4.7 I am preoccupied by the past                                              | <input type="checkbox"/> | <input type="checkbox"/> | <input type="checkbox"/> | <input type="checkbox"/> |
| 4.8 It's easy for me to keep track of my thoughts and feelings.               | <input type="checkbox"/> | <input type="checkbox"/> | <input type="checkbox"/> | <input type="checkbox"/> |
| 4.9 I try to notice my thoughts without judging them                          | <input type="checkbox"/> | <input type="checkbox"/> | <input type="checkbox"/> | <input type="checkbox"/> |
| 4.10 I am able to accept the thoughts and feelings I have.                    | <input type="checkbox"/> | <input type="checkbox"/> | <input type="checkbox"/> | <input type="checkbox"/> |
| 4.11 I am able to focus on the present moment                                 | <input type="checkbox"/> | <input type="checkbox"/> | <input type="checkbox"/> | <input type="checkbox"/> |
| 4.12 I am able to pay close attention to one thing for a long period of time. | <input type="checkbox"/> | <input type="checkbox"/> | <input type="checkbox"/> | <input type="checkbox"/> |

Participant ID No.: \_\_\_\_\_

## 5. Pain acceptance

Below you will find a list of statements. Please rate the truth of each statement as it applies to you by ticking one response, where 0 is 'never true' and 6 is 'always true'.

**5.1. I am getting on with the business of living no matter what my level of pain is** (Please tick one box)

| Never true               |                          |                          |                          |                          |                          |                          |                          | Always true |
|--------------------------|--------------------------|--------------------------|--------------------------|--------------------------|--------------------------|--------------------------|--------------------------|-------------|
| 0                        | 1                        | 2                        | 3                        | 4                        | 5                        | 6                        |                          |             |
| <input type="checkbox"/> | <input type="checkbox"/> | <input type="checkbox"/> | <input type="checkbox"/> | <input type="checkbox"/> | <input type="checkbox"/> | <input type="checkbox"/> | <input type="checkbox"/> |             |

**5.2. Although things have changed, I am living a normal life despite my chronic pain**

(Please tick one box)

| Never true               |                          |                          |                          |                          |                          |                          |                          | Always true |
|--------------------------|--------------------------|--------------------------|--------------------------|--------------------------|--------------------------|--------------------------|--------------------------|-------------|
| 0                        | 1                        | 2                        | 3                        | 4                        | 5                        | 6                        |                          |             |
| <input type="checkbox"/> | <input type="checkbox"/> | <input type="checkbox"/> | <input type="checkbox"/> | <input type="checkbox"/> | <input type="checkbox"/> | <input type="checkbox"/> | <input type="checkbox"/> |             |

**5.3. I lead a full life even though I have chronic pain** (Please tick one box)

| Never true               |                          |                          |                          |                          |                          |                          |                          | Always true |
|--------------------------|--------------------------|--------------------------|--------------------------|--------------------------|--------------------------|--------------------------|--------------------------|-------------|
| 0                        | 1                        | 2                        | 3                        | 4                        | 5                        | 6                        |                          |             |
| <input type="checkbox"/> | <input type="checkbox"/> | <input type="checkbox"/> | <input type="checkbox"/> | <input type="checkbox"/> | <input type="checkbox"/> | <input type="checkbox"/> | <input type="checkbox"/> |             |

**5.4. Keeping my pain level under control takes first priority whenever I'm doing something**

(Please tick one box)

| Never true               |                          |                          |                          |                          |                          |                          |                          | Always true |
|--------------------------|--------------------------|--------------------------|--------------------------|--------------------------|--------------------------|--------------------------|--------------------------|-------------|
| 0                        | 1                        | 2                        | 3                        | 4                        | 5                        | 6                        |                          |             |
| <input type="checkbox"/> | <input type="checkbox"/> | <input type="checkbox"/> | <input type="checkbox"/> | <input type="checkbox"/> | <input type="checkbox"/> | <input type="checkbox"/> | <input type="checkbox"/> |             |

**5.5. Before I can make any serious plans, I have to get some control over my pain** (Please tick one box)

| Never true               |                          |                          |                          |                          |                          |                          |                          | Always true |
|--------------------------|--------------------------|--------------------------|--------------------------|--------------------------|--------------------------|--------------------------|--------------------------|-------------|
| 0                        | 1                        | 2                        | 3                        | 4                        | 5                        | 6                        |                          |             |
| <input type="checkbox"/> | <input type="checkbox"/> | <input type="checkbox"/> | <input type="checkbox"/> | <input type="checkbox"/> | <input type="checkbox"/> | <input type="checkbox"/> | <input type="checkbox"/> |             |

**Pain acceptance (continued...)**

**5.6. When my pain increases, I can still take care of my responsibilities** (Please tick one box)





Participant ID No.: \_\_\_\_\_

## 7. Confidence

Please indicate how **confident** you are that you can do the following things **at present**, despite the pain, where 0 is 'not at all confident' and 6 is 'completely confident'

\*\* Remember, these questions are not asking whether or not you have been doing these things, but rather how confident you are that you could do them **at present**, despite the pain

### 7.1. I can enjoy things, despite the pain (Please tick one box)

|                          |                          |                          |                          |                          |                          |                          |                          |                             |
|--------------------------|--------------------------|--------------------------|--------------------------|--------------------------|--------------------------|--------------------------|--------------------------|-----------------------------|
| <b>Not confident</b>     |                          |                          |                          |                          |                          |                          |                          | <b>completely confident</b> |
| <b>0</b>                 | <b>1</b>                 | <b>2</b>                 | <b>3</b>                 | <b>4</b>                 | <b>5</b>                 | <b>6</b>                 |                          |                             |
| <input type="checkbox"/> | <input type="checkbox"/> | <input type="checkbox"/> | <input type="checkbox"/> | <input type="checkbox"/> | <input type="checkbox"/> | <input type="checkbox"/> | <input type="checkbox"/> | <input type="checkbox"/>    |

### 7.2. I can do most household chores (e.g. tidying up, washing dishes etc), despite the pain (Please tick one box)

|                          |                          |                          |                          |                          |                          |                          |                          |                             |
|--------------------------|--------------------------|--------------------------|--------------------------|--------------------------|--------------------------|--------------------------|--------------------------|-----------------------------|
| <b>Not confident</b>     |                          |                          |                          |                          |                          |                          |                          | <b>completely confident</b> |
| <b>0</b>                 | <b>1</b>                 | <b>2</b>                 | <b>3</b>                 | <b>4</b>                 | <b>5</b>                 | <b>6</b>                 |                          |                             |
| <input type="checkbox"/> | <input type="checkbox"/> | <input type="checkbox"/> | <input type="checkbox"/> | <input type="checkbox"/> | <input type="checkbox"/> | <input type="checkbox"/> | <input type="checkbox"/> | <input type="checkbox"/>    |

### 7.3. I can socialise with my friends or family members as often as I used to, despite the pain (Please tick one box)

|                          |                          |                          |                          |                          |                          |                          |                          |                             |
|--------------------------|--------------------------|--------------------------|--------------------------|--------------------------|--------------------------|--------------------------|--------------------------|-----------------------------|
| <b>Not confident</b>     |                          |                          |                          |                          |                          |                          |                          | <b>completely confident</b> |
| <b>0</b>                 | <b>1</b>                 | <b>2</b>                 | <b>3</b>                 | <b>4</b>                 | <b>5</b>                 | <b>6</b>                 |                          |                             |
| <input type="checkbox"/> | <input type="checkbox"/> | <input type="checkbox"/> | <input type="checkbox"/> | <input type="checkbox"/> | <input type="checkbox"/> | <input type="checkbox"/> | <input type="checkbox"/> | <input type="checkbox"/>    |

### 7.4. I can cope with my pain in most situations (Please tick one box)

|                          |                          |                          |                          |                          |                          |                          |                          |                             |
|--------------------------|--------------------------|--------------------------|--------------------------|--------------------------|--------------------------|--------------------------|--------------------------|-----------------------------|
| <b>Not confident</b>     |                          |                          |                          |                          |                          |                          |                          | <b>completely confident</b> |
| <b>0</b>                 | <b>1</b>                 | <b>2</b>                 | <b>3</b>                 | <b>4</b>                 | <b>5</b>                 | <b>6</b>                 |                          |                             |
| <input type="checkbox"/> | <input type="checkbox"/> | <input type="checkbox"/> | <input type="checkbox"/> | <input type="checkbox"/> | <input type="checkbox"/> | <input type="checkbox"/> | <input type="checkbox"/> | <input type="checkbox"/>    |

### 7.5. I can do some form of work, despite the pain ('work' includes housework, paid and unpaid work) (Please tick one box)

|                          |                          |                          |                          |                          |                          |                          |                          |                             |
|--------------------------|--------------------------|--------------------------|--------------------------|--------------------------|--------------------------|--------------------------|--------------------------|-----------------------------|
| <b>Not confident</b>     |                          |                          |                          |                          |                          |                          |                          | <b>completely confident</b> |
| <b>0</b>                 | <b>1</b>                 | <b>2</b>                 | <b>3</b>                 | <b>4</b>                 | <b>5</b>                 | <b>6</b>                 |                          |                             |
| <input type="checkbox"/> | <input type="checkbox"/> | <input type="checkbox"/> | <input type="checkbox"/> | <input type="checkbox"/> | <input type="checkbox"/> | <input type="checkbox"/> | <input type="checkbox"/> | <input type="checkbox"/>    |

### Confidence (continued...)

### 7.6. I can still do many of the things I enjoy doing, such as hobbies or leisure activity, despite the pain (Please tick one box)





Participant ID No.: \_\_\_\_\_

## 8. Intimate life

### Satisfaction

- 8.1 During the past 4 weeks, how satisfied were you with the frequency of your sexual activity (with or without a partner)?
- Very satisfied  
 Somewhat satisfied  
 Neither satisfied nor dissatisfied  
 Somewhat dissatisfied  
 Very dissatisfied
- 
- 8.2 During the past 4 weeks, how satisfied in general have you been with your ability to have and enjoy sex with/without a partner?
- Very satisfied  
 Somewhat satisfied  
 Neither satisfied nor dissatisfied  
 Somewhat dissatisfied  
 Very dissatisfied  
 I don't have a partner/  
 I don't have sex without a partner

### Orgasm

- 8.3 During the past 4 weeks, when you had sexual activity, how much of the time did you experience orgasm?
- Never  
 Rarely  
 Sometimes  
 Most of the time  
 All of the time  
 I did not have sexual activity
- 
- 8.4 During the past 4 weeks, when you had sexual activity, how much of the time did you feel satisfied after sexual activity?
- Never  
 Rarely  
 Sometimes  
 Most of the time  
 All of the time  
 I did not have sexual activity

*Intimate life (continued...)*

Participant ID No.: \_\_\_\_\_

### Orgasm

- 8.5 During the past 4 weeks, when you experienced orgasm, how strong or intense was the orgasm on average?
- Did not experience any orgasms
- Mild
- Moderate
- Strong

- 8.6 During the past 4 weeks, how much of a problem was difficulty in having an orgasm?
- Not a problem
- Little of a problem
- Somewhat of a problem
- Very much of a problem
- I did not have sexual activity

### Desire

- 8.7 During the past 4 weeks, how much of a problem was lack of sexual interest?
- Not a problem
- Little of a problem
- Somewhat of a problem
- Very much of a problem
- I did not have sexual activity

- 8.8 During the past 4 weeks, how often did you desire sex (with or without a partner?)
- Never
- Once or twice
- 3-4 times
- 5-6 times
- More than 6 times

- 8.9 During the past 4 weeks, how much of a problem was inability to relax and enjoy sex?
- Not a problem
- Little of a problem
- Somewhat of a problem
- Very much of a problem
- I did not have sexual activity

### *Intimate life (continued...)*

### Pelvic problem interference

Participant ID No.: \_\_\_\_\_

---

**8.10** During the past 4 weeks, to what extent has your bleeding interfered with your normal or regular sexual activity (with or without a partner)?

- Not at all
  - Slightly
  - Moderately
  - Quite a bit
  - Extremely
- 

**8.11** During the past 4 weeks, to what extent has your pelvic pain or discomfort interfered with your normal or regular sexual activity (with or without a partner)?

- Not at all
  - Slightly
  - Moderately
  - Quite a bit
  - Extremely
- 

**8.12** During the past 4 weeks, to what extent have your pelvic problems overall interfered with your normal or regular sexual activity (with or without a partner)?

- Not at all
  - Slightly
  - Moderately
  - Quite a bit
  - Extremely
- 

**THANK YOU FOR FILLING IN THE QUESTIONNAIRE**

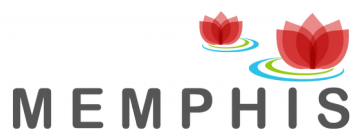

Participant ID No.: \_\_\_\_\_

## APP USABILITY QUESTIONNAIRE

### APP USABILITY QUESTIONNAIRE Confidential

*Dear Participant,*

*The following questionnaire will explore your current experience using the smartphone app. It will usually take 5 to 10 minutes to complete. It is comprised of **two parts**:*

- **Part 1:** consists of 10 brief questions with five response options
- **Part 2:** consists of 10 brief questions, with response options and comments sections

*We would appreciate you completing as much as possible.*

*Please read the questions carefully. If you have any difficulties with the questionnaire please contact the study team.*

*The questionnaire is confidential and your answers will be used only for research purposes.*

**Please write date completed: DD / MMM / YYYY**

Participant ID No.: \_\_\_\_\_

**PART 1**

**System Usability Scale (SUS)**

**1. I think that I would like to use this app frequently (Please tick one box)**

| <b>Totally disagree</b>    | <b>Somewhat disagree</b>   | <b>Neither agree nor disagree</b> | <b>Somewhat agree</b>      | <b>Totally agree</b>       |
|----------------------------|----------------------------|-----------------------------------|----------------------------|----------------------------|
| Participant ID No.: _____  |                            |                                   |                            |                            |
| 1 <input type="checkbox"/> | 2 <input type="checkbox"/> | 3 <input type="checkbox"/>        | 4 <input type="checkbox"/> | 5 <input type="checkbox"/> |

**2. I found the app unnecessarily complex (Please tick one box)**

| <b>Totally disagree</b>    | <b>Somewhat disagree</b>   | <b>Neither agree nor disagree</b> | <b>Somewhat agree</b>      | <b>Totally agree</b>       |
|----------------------------|----------------------------|-----------------------------------|----------------------------|----------------------------|
|                            |                            |                                   |                            |                            |
| 1 <input type="checkbox"/> | 2 <input type="checkbox"/> | 3 <input type="checkbox"/>        | 4 <input type="checkbox"/> | 5 <input type="checkbox"/> |

**3. I thought the app was easy to use (Please tick one box)**

| <b>Totally disagree</b>    | <b>Somewhat disagree</b>   | <b>Neither agree nor disagree</b> | <b>Somewhat agree</b>      | <b>Totally agree</b>       |
|----------------------------|----------------------------|-----------------------------------|----------------------------|----------------------------|
|                            |                            |                                   |                            |                            |
| 1 <input type="checkbox"/> | 2 <input type="checkbox"/> | 3 <input type="checkbox"/>        | 4 <input type="checkbox"/> | 5 <input type="checkbox"/> |

**4. I think I would need the support of a technical person to be able to use this app (Please tick one box)**

| <b>Totally disagree</b>    | <b>Somewhat disagree</b>   | <b>Neither agree nor disagree</b> | <b>Somewhat agree</b>      | <b>Totally agree</b>       |
|----------------------------|----------------------------|-----------------------------------|----------------------------|----------------------------|
|                            |                            |                                   |                            |                            |
| 1 <input type="checkbox"/> | 2 <input type="checkbox"/> | 3 <input type="checkbox"/>        | 4 <input type="checkbox"/> | 5 <input type="checkbox"/> |

**5. I found the various functions in the app worked well together (Please tick one box)**

| <b>Totally disagree</b>    | <b>Somewhat disagree</b>   | <b>Neither agree nor disagree</b> | <b>Somewhat agree</b>      | <b>Totally agree</b>       |
|----------------------------|----------------------------|-----------------------------------|----------------------------|----------------------------|
|                            |                            |                                   |                            |                            |
| 1 <input type="checkbox"/> | 2 <input type="checkbox"/> | 3 <input type="checkbox"/>        | 4 <input type="checkbox"/> | 5 <input type="checkbox"/> |

**6. I thought there was too much inconsistency in this app (Please tick one box)**

| <b>Totally disagree</b>    | <b>Somewhat disagree</b>   | <b>Neither agree nor disagree</b> | <b>Somewhat agree</b>      | <b>Totally agree</b>       |
|----------------------------|----------------------------|-----------------------------------|----------------------------|----------------------------|
|                            |                            |                                   |                            |                            |
| 1 <input type="checkbox"/> | 2 <input type="checkbox"/> | 3 <input type="checkbox"/>        | 4 <input type="checkbox"/> | 5 <input type="checkbox"/> |

**7. I would imagine that most people would learn to use this app very quickly (Please tick one box)**

| <b>Totally disagree</b>    | <b>Somewhat disagree</b>   | <b>Neither agree nor disagree</b> | <b>Somewhat agree</b>      | <b>Totally agree</b>       |
|----------------------------|----------------------------|-----------------------------------|----------------------------|----------------------------|
|                            |                            |                                   |                            |                            |
| 1 <input type="checkbox"/> | 2 <input type="checkbox"/> | 3 <input type="checkbox"/>        | 4 <input type="checkbox"/> | 5 <input type="checkbox"/> |

**8. I found the app very cumbersome to use (Please tick one box)**

| <b>Totally disagree</b>    | <b>Somewhat Disagree</b>   | <b>Neither agree nor disagree</b> | <b>Somewhat agree</b>      | <b>Totally agree</b>       |
|----------------------------|----------------------------|-----------------------------------|----------------------------|----------------------------|
|                            |                            |                                   |                            |                            |
| 1 <input type="checkbox"/> | 2 <input type="checkbox"/> | 3 <input type="checkbox"/>        | 4 <input type="checkbox"/> | 5 <input type="checkbox"/> |

**9. I felt very confident using the app (Please tick one box)**

| <b>Totally disagree</b> | <b>Somewhat Disagree</b> | <b>Neither agree nor disagree</b> | <b>Somewhat agree</b> | <b>Totally agree</b> |
|-------------------------|--------------------------|-----------------------------------|-----------------------|----------------------|
|                         |                          |                                   |                       |                      |

Participant ID No.: \_\_\_\_\_

**Final Score** (Only for research team)

Participant ID No.: \_\_\_\_\_

## **PART 2**

### **App Satisfaction Measurement**

**1. It is easy to access the app whenever I wanted to use it (Please tick one box)**

|                          |                          |                                   |                          |                          |
|--------------------------|--------------------------|-----------------------------------|--------------------------|--------------------------|
| <b>Totally disagree</b>  | <b>Somewhat disagree</b> | <b>Neither agree nor disagree</b> | <b>Somewhat agree</b>    | <b>Totally agree</b>     |
| <input type="checkbox"/> | <input type="checkbox"/> | <input type="checkbox"/>          | <input type="checkbox"/> | <input type="checkbox"/> |

**2. After being shown, I understood how the app would work (Please tick one box)**

|                          |                          |                                   |                          |                          |
|--------------------------|--------------------------|-----------------------------------|--------------------------|--------------------------|
| <b>Totally disagree</b>  | <b>Somewhat disagree</b> | <b>Neither agree nor disagree</b> | <b>Somewhat agree</b>    | <b>Totally agree</b>     |
| <input type="checkbox"/> | <input type="checkbox"/> | <input type="checkbox"/>          | <input type="checkbox"/> | <input type="checkbox"/> |

**3. It was fun to work with the app (Please tick one box)**

|                          |                          |                                   |                          |                          |
|--------------------------|--------------------------|-----------------------------------|--------------------------|--------------------------|
| <b>Totally disagree</b>  | <b>Somewhat disagree</b> | <b>Neither agree nor disagree</b> | <b>Somewhat agree</b>    | <b>Totally agree</b>     |
| <input type="checkbox"/> | <input type="checkbox"/> | <input type="checkbox"/>          | <input type="checkbox"/> | <input type="checkbox"/> |

**4. The app worked well (Please tick one box)**

|                          |                          |                                   |                          |                          |
|--------------------------|--------------------------|-----------------------------------|--------------------------|--------------------------|
| <b>Totally disagree</b>  | <b>Somewhat disagree</b> | <b>Neither agree nor disagree</b> | <b>Somewhat agree</b>    | <b>Totally agree</b>     |
| <input type="checkbox"/> | <input type="checkbox"/> | <input type="checkbox"/>          | <input type="checkbox"/> | <input type="checkbox"/> |

**5. It was easy to work through the modules (Please tick one box)**

|                          |                          |                                   |                          |                          |
|--------------------------|--------------------------|-----------------------------------|--------------------------|--------------------------|
| <b>Totally disagree</b>  | <b>Somewhat disagree</b> | <b>Neither agree nor disagree</b> | <b>Somewhat agree</b>    | <b>Totally agree</b>     |
| <input type="checkbox"/> | <input type="checkbox"/> | <input type="checkbox"/>          | <input type="checkbox"/> | <input type="checkbox"/> |

**6. The number of modules was annoying (Please tick one box)**

|                          |                          |                                   |                          |                          |
|--------------------------|--------------------------|-----------------------------------|--------------------------|--------------------------|
| <b>Totally disagree</b>  | <b>Somewhat disagree</b> | <b>Neither agree nor disagree</b> | <b>Somewhat agree</b>    | <b>Totally agree</b>     |
| <input type="checkbox"/> | <input type="checkbox"/> | <input type="checkbox"/>          | <input type="checkbox"/> | <input type="checkbox"/> |

**7. The modules were well-displayed on my smartphone (Please tick one box)**



Participant ID No.: \_\_\_\_\_

|                          |                          |                                   |                          |                          |
|--------------------------|--------------------------|-----------------------------------|--------------------------|--------------------------|
| <i>Totally disagree</i>  | <i>Somewhat disagree</i> | <i>Neither agree nor disagree</i> | <i>Somewhat agree</i>    | <i>Totally agree</i>     |
| <input type="checkbox"/> | <input type="checkbox"/> | <input type="checkbox"/>          | <input type="checkbox"/> | <input type="checkbox"/> |

**8. Using the app was difficult because of my daily activities (Please tick one box)**

|                          |                          |                                   |                          |                          |
|--------------------------|--------------------------|-----------------------------------|--------------------------|--------------------------|
| <i>Totally disagree</i>  | <i>Somewhat disagree</i> | <i>Neither agree nor disagree</i> | <i>Somewhat agree</i>    | <i>Totally agree</i>     |
| <input type="checkbox"/> | <input type="checkbox"/> | <input type="checkbox"/>          | <input type="checkbox"/> | <input type="checkbox"/> |

**9. Using the app took too long (Please tick one box)**

|                          |                          |                                   |                          |                          |
|--------------------------|--------------------------|-----------------------------------|--------------------------|--------------------------|
| <i>Totally disagree</i>  | <i>Somewhat disagree</i> | <i>Neither agree nor disagree</i> | <i>Somewhat agree</i>    | <i>Totally agree</i>     |
| <input type="checkbox"/> | <input type="checkbox"/> | <input type="checkbox"/>          | <input type="checkbox"/> | <input type="checkbox"/> |

**10. Did you use the app every day? If no, why: (Please tick one box)**

Yes

No  If no, please say why:

**THANK YOU FOR FILLING IN THE QUESTIONNAIRE**

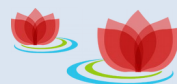

**MEMPHIS**

Feasibility study

Participant ID No.: \_\_\_\_\_

## 6 MONTH FOLLOW-UP QUESTIONNAIRE

### Confidential

*Dear Participant,*

*The aim of this questionnaire is to find out your current health state and get to know how you feel about living with chronic pain before you participate in the MEMPHIS study. You don't have to answer*

*any question you are not comfortable with but we would appreciate you completing as much as possible.*

*Please read the questions carefully. If you have any difficulties with the questionnaire please contact the study team.*

Please write date completed: DD / MMM / YYYY

Participant ID No.: \_\_\_\_\_

## 9. General Health

These questions ask for your views about your health. This information will help keep track of how you feel and how well you are able to do your usual activities.

Please answer every question by marking the answer as indicated. If you are unsure about how to answer a question, please give the best answer you can. When answering the question please assess how you felt in the last four weeks.

### 1.1. In general, would you say your health is? (Please tick one box)

| <i>Excellent</i>         | <i>Very good</i>         | <i>Good</i>              | <i>Fair</i>              | <i>Poor</i>              |
|--------------------------|--------------------------|--------------------------|--------------------------|--------------------------|
| <input type="checkbox"/> | <input type="checkbox"/> | <input type="checkbox"/> | <input type="checkbox"/> | <input type="checkbox"/> |

### 1.2. Compared to one year ago, how would you rate your health in general now? (Please tick one box)

| <i>Much better now than one year ago</i> | <i>Somewhat better now than one year ago</i> | <i>About the same</i>    | <i>Somewhat worse now than one year ago</i> | <i>Much worse than one year ago</i> |
|------------------------------------------|----------------------------------------------|--------------------------|---------------------------------------------|-------------------------------------|
| <input type="checkbox"/>                 | <input type="checkbox"/>                     | <input type="checkbox"/> | <input type="checkbox"/>                    | <input type="checkbox"/>            |

1.3 The following items are about activities you might do during a typical day. Does your health now limit you in these activities? If so how much?

| <b>a. Vigorous activities, such as running, lifting heavy objects, participating in strenuous sports</b><br>(Please tick <u>one</u> box) | <b>b. Moderate activities, such as moving a table, pushing a vacuum cleaner, bowling, or playing golf</b><br>(Please tick <u>one</u> box) |
|------------------------------------------------------------------------------------------------------------------------------------------|-------------------------------------------------------------------------------------------------------------------------------------------|
| Yes, limited a lot <input type="checkbox"/>                                                                                              | Yes, limited a lot <input type="checkbox"/>                                                                                               |
| Yes, limited a little <input type="checkbox"/>                                                                                           | Yes, limited a little <input type="checkbox"/>                                                                                            |
| No, not limited at all <input type="checkbox"/>                                                                                          | No, not limited at all <input type="checkbox"/>                                                                                           |
| <b>c. Lifting or carrying groceries</b><br>(Please tick <u>one</u> box)                                                                  | <b>d. Climbing several flights of stairs</b><br>(Please tick <u>one</u> box)                                                              |
| Yes, limited a lot <input type="checkbox"/>                                                                                              | Yes, limited a lot <input type="checkbox"/>                                                                                               |
| Yes, limited a little <input type="checkbox"/>                                                                                           | Yes, limited a little <input type="checkbox"/>                                                                                            |
| No, not limited at all <input type="checkbox"/>                                                                                          | No, not limited at all <input type="checkbox"/>                                                                                           |

Participant ID No.: \_\_\_\_\_

### General Health continued...

|                                                                         |                                                                         |
|-------------------------------------------------------------------------|-------------------------------------------------------------------------|
| <b>e. Climbing one flight of stairs</b><br>(Please tick <u>one</u> box) | <b>f. Bending, kneeling or stooping</b><br>(Please tick <u>one</u> box) |
| Yes, limited a lot <input type="checkbox"/>                             | Yes, limited a lot <input type="checkbox"/>                             |
| Yes, limited a little <input type="checkbox"/>                          | Yes, limited a little <input type="checkbox"/>                          |
| No, not limited at all <input type="checkbox"/>                         | No, not limited at all <input type="checkbox"/>                         |
| <b>g. Walking more than a mile</b><br>(Please tick <u>one</u> box)      | <b>h. Walking several hundred yards</b><br>(Please tick <u>one</u> box) |
| Yes, limited a lot <input type="checkbox"/>                             | Yes, limited a lot <input type="checkbox"/>                             |
| Yes, limited a little <input type="checkbox"/>                          | Yes, limited a little <input type="checkbox"/>                          |
| No, not limited at all <input type="checkbox"/>                         | No, not limited at all <input type="checkbox"/>                         |
| <b>i. Walking one hundred yards</b><br>(Please tick <u>one</u> box)     | <b>j. Bathing or dressing yourself</b><br>(Please tick <u>one</u> box)  |
| Yes, limited a lot <input type="checkbox"/>                             | Yes, limited a lot <input type="checkbox"/>                             |
| Yes, limited a little <input type="checkbox"/>                          | Yes, limited a little <input type="checkbox"/>                          |
| No, not limited at all <input type="checkbox"/>                         | No, not limited at all <input type="checkbox"/>                         |

1.4 During the **past 4 weeks**, have you had any of the following problems with your work or other regular daily activities as a result of your physical health?

|                                                                                                          |                                                                              |
|----------------------------------------------------------------------------------------------------------|------------------------------------------------------------------------------|
| <b>a. Cut down the amount of time you spent on work or other activities</b> (Please tick <u>one</u> box) | <b>b. Accomplished less than you would like</b> (Please tick <u>one</u> box) |
| All of the time <input type="checkbox"/>                                                                 | All of the time <input type="checkbox"/>                                     |
| Most of the time <input type="checkbox"/>                                                                | Most of the time <input type="checkbox"/>                                    |
| Some of the time <input type="checkbox"/>                                                                | Some of the time <input type="checkbox"/>                                    |
| A little of the time <input type="checkbox"/>                                                            | A little of the time <input type="checkbox"/>                                |
| None of the time <input type="checkbox"/>                                                                | None of the time <input type="checkbox"/>                                    |

### General Health continued...

|                                                                                             |                                                                                                                                   |
|---------------------------------------------------------------------------------------------|-----------------------------------------------------------------------------------------------------------------------------------|
| <b>c. Were limited in the kind of work or other activities</b> (Please tick <u>one</u> box) | <b>d. Had difficulty performing the work or other activities (for example, it took extra effort)</b> (Please tick <u>one</u> box) |
| All of the time <input type="checkbox"/>                                                    | All of the time <input type="checkbox"/>                                                                                          |
| Most of the time <input type="checkbox"/>                                                   | Most of the time <input type="checkbox"/>                                                                                         |
| Some of the time <input type="checkbox"/>                                                   | Some of the time <input type="checkbox"/>                                                                                         |
| A little of the time <input type="checkbox"/>                                               | A little of the time <input type="checkbox"/>                                                                                     |

Participant ID No.: \_\_\_\_\_

None of the time

None of the time

1.5 During the **past 4 weeks**, have you had any of the following problems with your work or other regular daily activities as a result of any emotional problems (such as feeling depressed or anxious)?

**a. Cut down the amount of time you spent on work or other activities** (Please tick one box)

All of the time

Most of the time

Some of the time

A little of the time

None of the time

**b. Accomplished less than you would like**

(Please tick one box)

All of the time

Most of the time

Some of the time

A little of the time

None of the time

**c. Did work or other activities less carefully than usual** (Please tick one box)

All of the time

Most of the time

Some of the time

A little of the time

None of the time

Participant ID No.: \_\_\_\_\_

### General Health continued...

**1.6. During the past 4 weeks, to what extent has your physical health or emotional problems interfered with your normal social activities with family, friends, neighbours or groups? (Please tick one box)**

*Not at all*

*Slightly*

*Moderately*

*Quite a bit*

*Extremely*

**1.7. How much bodily pain have you had during the past 4 weeks? (Please tick one box)**

*None*

*Very mild*

*Mild*

*Moderate*

*Severe*

*Very severe*

**1.8. During the past 4 weeks, how much did pain interfere with your normal work (including both work outside the home and housework)? (Please tick one box)**

*Not at all*

*A little bit*

*Moderately*

*Quite a bit*

*Extremely*

**1.9. These questions are about how you feel and how things have been with you during the past 4 weeks. For each question, please give the answer that comes closest to the way you have been feeling.**

**a. Did you feel full of life? (Please tick one box)**

All of the time

Most of the time

Some of the time

A little of the time

None of the time

**b. Have you been very nervous?**

(Please tick one box)

All of the time

Most of the time

Some of the time

A little of the time

None of the time

**c. Have you felt so down in the dumps that nothing could cheer you up? (Please tick one box)**

All of the time

Most of the time

Some of the time

A little of the time

None of the time

**d. Have you felt calm and peaceful?**

(Please tick one box)

All of the time

Most of the time

Some of the time

A little of the time

None of the time

### General Health continued...

**e. Did you have lots of energy?**

(Please tick one box)

**f. Have you felt downhearted and depressed?**

(Please tick one box)

Participant ID No.: \_\_\_\_\_

|                                                               |                          |                                                             |                          |
|---------------------------------------------------------------|--------------------------|-------------------------------------------------------------|--------------------------|
| All of the time                                               | <input type="checkbox"/> | All of the time                                             | <input type="checkbox"/> |
| Most of the time                                              | <input type="checkbox"/> | Most of the time                                            | <input type="checkbox"/> |
| Some of the time                                              | <input type="checkbox"/> | Some of the time                                            | <input type="checkbox"/> |
| A little of the time                                          | <input type="checkbox"/> | A little of the time                                        | <input type="checkbox"/> |
| None of the time                                              | <input type="checkbox"/> | None of the time                                            | <input type="checkbox"/> |
| <b>g. Did you feel worn out? (Please tick <u>one</u> box)</b> |                          | <b>h. Have you been happy? (Please tick <u>one</u> box)</b> |                          |
| All of the time                                               | <input type="checkbox"/> | All of the time                                             | <input type="checkbox"/> |
| Most of the time                                              | <input type="checkbox"/> | Most of the time                                            | <input type="checkbox"/> |
| Some of the time                                              | <input type="checkbox"/> | Some of the time                                            | <input type="checkbox"/> |
| A little of the time                                          | <input type="checkbox"/> | A little of the time                                        | <input type="checkbox"/> |
| None of the time                                              | <input type="checkbox"/> | None of the time                                            | <input type="checkbox"/> |
| <b>i. Did you feel tired? (Please tick <u>one</u> box)</b>    |                          |                                                             |                          |
| All of the time                                               | <input type="checkbox"/> |                                                             |                          |
| Most of the time                                              | <input type="checkbox"/> |                                                             |                          |
| Some of the time                                              | <input type="checkbox"/> |                                                             |                          |
| A little of the time                                          | <input type="checkbox"/> |                                                             |                          |
| None of the time                                              | <input type="checkbox"/> |                                                             |                          |

**1.10. During the past 4 weeks, how much of the time has your physical health or emotional problems interfered with your social activities (like visiting friends, relatives, etc.?) (Please tick one box)**

|                          |                          |                          |                             |                          |
|--------------------------|--------------------------|--------------------------|-----------------------------|--------------------------|
| <i>All of the time</i>   | <i>Most of the time</i>  | <i>Some of the time</i>  | <i>A little of the time</i> | <i>None of the time</i>  |
| <input type="checkbox"/> | <input type="checkbox"/> | <input type="checkbox"/> | <input type="checkbox"/>    | <input type="checkbox"/> |

Participant ID No.: \_\_\_\_\_

## General Health continued...

1.11 How true or false is each of the following statements for you?

| <b>a. I seem to get sick a little easier than other people</b><br><i>(Please tick <u>one</u> box)</i> | <b>b. I am as healthy as anybody I know</b><br><i>(Please tick <u>one</u> box)</i> |
|-------------------------------------------------------------------------------------------------------|------------------------------------------------------------------------------------|
| Definitely true <input type="checkbox"/>                                                              | Definitely true <input type="checkbox"/>                                           |
| Mostly true <input type="checkbox"/>                                                                  | Mostly true <input type="checkbox"/>                                               |
| Don't know <input type="checkbox"/>                                                                   | Don't know <input type="checkbox"/>                                                |
| Mostly false <input type="checkbox"/>                                                                 | Mostly false <input type="checkbox"/>                                              |
| Definitely false <input type="checkbox"/>                                                             | Definitely false <input type="checkbox"/>                                          |
| <b>c. I expect my health to get worse</b><br><i>(Please tick <u>one</u> box)</i>                      | <b>d. My health is excellent</b><br><i>(Please tick <u>one</u> box)</i>            |
| Definitely true <input type="checkbox"/>                                                              | Definitely true <input type="checkbox"/>                                           |
| Mostly true <input type="checkbox"/>                                                                  | Mostly true <input type="checkbox"/>                                               |
| Don't know <input type="checkbox"/>                                                                   | Don't know <input type="checkbox"/>                                                |
| Mostly false <input type="checkbox"/>                                                                 | Mostly false <input type="checkbox"/>                                              |
| Definitely false <input type="checkbox"/>                                                             | Definitely false <input type="checkbox"/>                                          |



Participant ID No.: \_\_\_\_\_

## 10. Your main symptoms

**2.1. Please circle the number to show how severe your problem has been IN THE LAST WEEK. This should be YOUR opinion, no-one else's! Please use the same symptoms and activity as on the baseline questionnaire.**

|                                                |                                      |                                      |                                      |                                      |                                      |                                      |                                      |
|------------------------------------------------|--------------------------------------|--------------------------------------|--------------------------------------|--------------------------------------|--------------------------------------|--------------------------------------|--------------------------------------|
| <b>SYMPTOM 1</b><br><b>(specify):</b><br>_____ | <b>0</b><br><input type="checkbox"/> | <b>1</b><br><input type="checkbox"/> | <b>2</b><br><input type="checkbox"/> | <b>3</b><br><input type="checkbox"/> | <b>4</b><br><input type="checkbox"/> | <b>5</b><br><input type="checkbox"/> | <b>6</b><br><input type="checkbox"/> |
|                                                | As good as it could be               |                                      |                                      | As bad as it could be                |                                      |                                      |                                      |

|                                                |                                      |                                      |                                      |                                      |                                      |                                      |                                      |
|------------------------------------------------|--------------------------------------|--------------------------------------|--------------------------------------|--------------------------------------|--------------------------------------|--------------------------------------|--------------------------------------|
| <b>SYMPTOM 2</b><br><b>(specify):</b><br>_____ | <b>0</b><br><input type="checkbox"/> | <b>1</b><br><input type="checkbox"/> | <b>2</b><br><input type="checkbox"/> | <b>3</b><br><input type="checkbox"/> | <b>4</b><br><input type="checkbox"/> | <b>5</b><br><input type="checkbox"/> | <b>6</b><br><input type="checkbox"/> |
|                                                | As good as it could be               |                                      |                                      | As bad as it could be                |                                      |                                      |                                      |

|                                     |                                      |                                      |                                      |                                      |                                      |                                      |                                      |
|-------------------------------------|--------------------------------------|--------------------------------------|--------------------------------------|--------------------------------------|--------------------------------------|--------------------------------------|--------------------------------------|
| <b>ACTIVITY (specify):</b><br>_____ | <b>0</b><br><input type="checkbox"/> | <b>1</b><br><input type="checkbox"/> | <b>2</b><br><input type="checkbox"/> | <b>3</b><br><input type="checkbox"/> | <b>4</b><br><input type="checkbox"/> | <b>5</b><br><input type="checkbox"/> | <b>6</b><br><input type="checkbox"/> |
|                                     | As good as it could be               |                                      |                                      | As bad as it could be                |                                      |                                      |                                      |

**2.2. How would you rate your general feeling of wellbeing during the last week?**

|                             |                                      |                                      |                                      |                                      |                                      |                                      |                                      |
|-----------------------------|--------------------------------------|--------------------------------------|--------------------------------------|--------------------------------------|--------------------------------------|--------------------------------------|--------------------------------------|
| <b>FEELING OF WELLBEING</b> | <b>0</b><br><input type="checkbox"/> | <b>1</b><br><input type="checkbox"/> | <b>2</b><br><input type="checkbox"/> | <b>3</b><br><input type="checkbox"/> | <b>4</b><br><input type="checkbox"/> | <b>5</b><br><input type="checkbox"/> | <b>6</b><br><input type="checkbox"/> |
|                             | As good as it could be               |                                      |                                      | As bad as it could be                |                                      |                                      |                                      |

**2.3. If an important new symptom has appeared please describe it and mark how bad it is below.**

|                                                |                                      |                                      |                                      |                                      |                                      |                                      |                                      |
|------------------------------------------------|--------------------------------------|--------------------------------------|--------------------------------------|--------------------------------------|--------------------------------------|--------------------------------------|--------------------------------------|
| <b>SYMPTOM 3</b><br><b>(specify):</b><br>_____ | <b>0</b><br><input type="checkbox"/> | <b>1</b><br><input type="checkbox"/> | <b>2</b><br><input type="checkbox"/> | <b>3</b><br><input type="checkbox"/> | <b>4</b><br><input type="checkbox"/> | <b>5</b><br><input type="checkbox"/> | <b>6</b><br><input type="checkbox"/> |
|                                                | As good as it could be               |                                      |                                      | As bad as it could be                |                                      |                                      |                                      |

The treatment you are receiving may not be the only thing affecting your problem. If there is anything else that you think is important, such as changes you have made yourself, or other things happening in your life, please write it here (write overleaf if you need more space):

**2.4. Are you taking any medication FOR THIS PROBLEM? (Please circle)**

**YES / NO**

Participant ID No.: \_\_\_\_\_

IF YES

2.5. a. Please write in name of medication, and how much a day/week

Name: \_\_\_\_\_ Dose: \_\_\_\_\_ mg \_\_\_\_\_ day/week (please circle)

Name: \_\_\_\_\_ Dose: \_\_\_\_\_ mg \_\_\_\_\_ day/week (please circle)

Name: \_\_\_\_\_ Dose: \_\_\_\_\_ mg \_\_\_\_\_ day/week (please circle)

Name: \_\_\_\_\_ Dose: \_\_\_\_\_ mg \_\_\_\_\_ day/week (please circle)

---

Participant ID No.: \_\_\_\_\_

## 11. Mood

Please read each item and tick the reply which comes closest to how you have been feeling **in the past week**.

Don't take too long over your replies: your immediate response to each item will probably be more accurate than a long thought out response.

| 3.1. I feel tense or "wound up" (Please tick <u>one</u> box) | 3.2. I still enjoy the things I used to enjoy (Please tick <u>one</u> box) |
|--------------------------------------------------------------|----------------------------------------------------------------------------|
| Most of the time <input type="checkbox"/>                    | Definitely as much <input type="checkbox"/>                                |
| A lot of the time <input type="checkbox"/>                   | Not quite as much <input type="checkbox"/>                                 |
| From time to time, occasionally <input type="checkbox"/>     | Only a little <input type="checkbox"/>                                     |
| Not at all <input type="checkbox"/>                          | Hardly at all <input type="checkbox"/>                                     |

| 3.3. I get a sort of frightened feeling as if something awful is about to happen (Please tick <u>one</u> box) | 3.4. I can laugh and see the funny side of things (Please tick <u>one</u> box) |
|---------------------------------------------------------------------------------------------------------------|--------------------------------------------------------------------------------|
| Very definitely and quite badly <input type="checkbox"/>                                                      | As much as I always could <input type="checkbox"/>                             |
| Yes, but not too badly <input type="checkbox"/>                                                               | Not quite so much now <input type="checkbox"/>                                 |
| A little but it doesn't worry me <input type="checkbox"/>                                                     | Definitely not so much now <input type="checkbox"/>                            |
| Not at all <input type="checkbox"/>                                                                           | Not at all <input type="checkbox"/>                                            |

| 3.5. Worrying thoughts go through my mind (Please tick <u>one</u> box) | 3.6. I feel cheerful (Please tick <u>one</u> box) |
|------------------------------------------------------------------------|---------------------------------------------------|
| A great deal of the time <input type="checkbox"/>                      | Not at all <input type="checkbox"/>               |
| A lot of the time <input type="checkbox"/>                             | Not often <input type="checkbox"/>                |
| From time to time but not too often <input type="checkbox"/>           | Sometimes <input type="checkbox"/>                |
| Only occasionally <input type="checkbox"/>                             | Most of the time <input type="checkbox"/>         |

Participant ID No.: \_\_\_\_\_

**Mood continued...**

| <b>3.7. I can sit at ease and feel relaxed</b><br><i>(Please tick <u>one</u> box)</i> | <b>3.8. I feel as if I am slowed down</b><br><i>(Please tick <u>one</u> box)</i> |
|---------------------------------------------------------------------------------------|----------------------------------------------------------------------------------|
| Definitely <input type="checkbox"/>                                                   | Nearly all of the time <input type="checkbox"/>                                  |
| Usually <input type="checkbox"/>                                                      | Very often <input type="checkbox"/>                                              |
| Not often <input type="checkbox"/>                                                    | Sometimes <input type="checkbox"/>                                               |
| Not at all <input type="checkbox"/>                                                   | Not at all <input type="checkbox"/>                                              |

| <b>3.9. I get a sort of frightened feeling like "butterflies" in the stomach</b><br><i>(Please tick <u>one</u> box)</i> | <b>3.10. I have lost interest in my appearance</b><br><i>(Please tick <u>one</u> box)</i> |
|-------------------------------------------------------------------------------------------------------------------------|-------------------------------------------------------------------------------------------|
| Not at all <input type="checkbox"/>                                                                                     | Definitely <input type="checkbox"/>                                                       |
| Occasionally <input type="checkbox"/>                                                                                   | I don't take as much care as I should <input type="checkbox"/>                            |
| Quite often <input type="checkbox"/>                                                                                    | I may not take quite as much care <input type="checkbox"/>                                |
| Very often <input type="checkbox"/>                                                                                     | I take just as much care as ever <input type="checkbox"/>                                 |

| <b>3.11. I feel restless as though I have to be on the move</b><br><i>(Please tick <u>one</u> box)</i> | <b>3.12. I look forward with enjoyment to things</b><br><i>(Please tick <u>one</u> box)</i> |
|--------------------------------------------------------------------------------------------------------|---------------------------------------------------------------------------------------------|
| Very much indeed <input type="checkbox"/>                                                              | As much as I ever did <input type="checkbox"/>                                              |
| Quite a lot <input type="checkbox"/>                                                                   | Rather less than I used to <input type="checkbox"/>                                         |
| Not very much <input type="checkbox"/>                                                                 | Definitely less than I used to <input type="checkbox"/>                                     |
| Not at all <input type="checkbox"/>                                                                    | Hardly at all <input type="checkbox"/>                                                      |

| <b>3.13. I get sudden feelings of panic</b><br><i>(Please tick <u>one</u> box)</i> | <b>3.14. I can enjoy a good book or radio or TV programme</b><br><i>(Please tick <u>one</u> box)</i> |
|------------------------------------------------------------------------------------|------------------------------------------------------------------------------------------------------|
| Very often indeed <input type="checkbox"/>                                         | Often <input type="checkbox"/>                                                                       |
| Quite often <input type="checkbox"/>                                               | Sometimes <input type="checkbox"/>                                                                   |
| Not very often <input type="checkbox"/>                                            | Not often <input type="checkbox"/>                                                                   |
| Not at all <input type="checkbox"/>                                                | Very seldom <input type="checkbox"/>                                                                 |

Participant ID No.: \_\_\_\_\_

## 12. Mental focus

Please respond to each item by marking one box per row.

| Items                                                                         | Rarely/<br>Not at All    | Sometimes                | Often                    | Almost<br>Always         |
|-------------------------------------------------------------------------------|--------------------------|--------------------------|--------------------------|--------------------------|
| 4.1 It is easy for me to concentrate on what I am doing.                      | <input type="checkbox"/> | <input type="checkbox"/> | <input type="checkbox"/> | <input type="checkbox"/> |
| 4.2 I am preoccupied by the future.                                           | <input type="checkbox"/> | <input type="checkbox"/> | <input type="checkbox"/> | <input type="checkbox"/> |
| 4.3 I can tolerate emotional pain                                             | <input type="checkbox"/> | <input type="checkbox"/> | <input type="checkbox"/> | <input type="checkbox"/> |
| 4.4 I can accept things I cannot change.                                      | <input type="checkbox"/> | <input type="checkbox"/> | <input type="checkbox"/> | <input type="checkbox"/> |
| 4.5 I can usually describe how I feel at the moment in considerable detail.   | <input type="checkbox"/> | <input type="checkbox"/> | <input type="checkbox"/> | <input type="checkbox"/> |
| 4.6 I am easily distracted.                                                   | <input type="checkbox"/> | <input type="checkbox"/> | <input type="checkbox"/> | <input type="checkbox"/> |
| 4.7 I am preoccupied by the past                                              | <input type="checkbox"/> | <input type="checkbox"/> | <input type="checkbox"/> | <input type="checkbox"/> |
| 4.8 It's easy for me to keep track of my thoughts and feelings.               | <input type="checkbox"/> | <input type="checkbox"/> | <input type="checkbox"/> | <input type="checkbox"/> |
| 4.9 I try to notice my thoughts without judging them                          | <input type="checkbox"/> | <input type="checkbox"/> | <input type="checkbox"/> | <input type="checkbox"/> |
| 4.10 I am able to accept the thoughts and feelings I have.                    | <input type="checkbox"/> | <input type="checkbox"/> | <input type="checkbox"/> | <input type="checkbox"/> |
| 4.11 I am able to focus on the present moment                                 | <input type="checkbox"/> | <input type="checkbox"/> | <input type="checkbox"/> | <input type="checkbox"/> |
| 4.12 I am able to pay close attention to one thing for a long period of time. | <input type="checkbox"/> | <input type="checkbox"/> | <input type="checkbox"/> | <input type="checkbox"/> |

Participant ID No.: \_\_\_\_\_

### 13. Pain acceptance

Below you will find a list of statements. Please rate the truth of each statement as it applies to you by ticking one response, where 0 is 'never true' and 6 is 'always true'.

**5.1. I am getting on with the business of living no matter what my level of pain is** (Please tick one box)

| Never true               |                          |                          |                          |                          |                          |                          | Always true              |  |
|--------------------------|--------------------------|--------------------------|--------------------------|--------------------------|--------------------------|--------------------------|--------------------------|--|
| 0                        | 1                        | 2                        | 3                        | 4                        | 5                        | 6                        |                          |  |
| <input type="checkbox"/> | <input type="checkbox"/> | <input type="checkbox"/> | <input type="checkbox"/> | <input type="checkbox"/> | <input type="checkbox"/> | <input type="checkbox"/> | <input type="checkbox"/> |  |

**5.2. Although things have changed, I am living a normal life despite my chronic pain**

(Please tick one box)

| Never true               |                          |                          |                          |                          |                          |                          | Always true              |  |
|--------------------------|--------------------------|--------------------------|--------------------------|--------------------------|--------------------------|--------------------------|--------------------------|--|
| 0                        | 1                        | 2                        | 3                        | 4                        | 5                        | 6                        |                          |  |
| <input type="checkbox"/> | <input type="checkbox"/> | <input type="checkbox"/> | <input type="checkbox"/> | <input type="checkbox"/> | <input type="checkbox"/> | <input type="checkbox"/> | <input type="checkbox"/> |  |

**5.3. I lead a full life even though I have chronic pain** (Please tick one box)

| Never true               |                          |                          |                          |                          |                          |                          | Always true              |  |
|--------------------------|--------------------------|--------------------------|--------------------------|--------------------------|--------------------------|--------------------------|--------------------------|--|
| 0                        | 1                        | 2                        | 3                        | 4                        | 5                        | 6                        |                          |  |
| <input type="checkbox"/> | <input type="checkbox"/> | <input type="checkbox"/> | <input type="checkbox"/> | <input type="checkbox"/> | <input type="checkbox"/> | <input type="checkbox"/> | <input type="checkbox"/> |  |

**5.4. Keeping my pain level under control takes first priority whenever I'm doing something**

(Please tick one box)

| Never true               |                          |                          |                          |                          |                          |                          | Always true              |  |
|--------------------------|--------------------------|--------------------------|--------------------------|--------------------------|--------------------------|--------------------------|--------------------------|--|
| 0                        | 1                        | 2                        | 3                        | 4                        | 5                        | 6                        |                          |  |
| <input type="checkbox"/> | <input type="checkbox"/> | <input type="checkbox"/> | <input type="checkbox"/> | <input type="checkbox"/> | <input type="checkbox"/> | <input type="checkbox"/> | <input type="checkbox"/> |  |

**5.5. Before I can make any serious plans, I have to get some control over my pain** (Please tick one box)

| Never true               |                          |                          |                          |                          |                          |                          | Always true              |  |
|--------------------------|--------------------------|--------------------------|--------------------------|--------------------------|--------------------------|--------------------------|--------------------------|--|
| 0                        | 1                        | 2                        | 3                        | 4                        | 5                        | 6                        |                          |  |
| <input type="checkbox"/> | <input type="checkbox"/> | <input type="checkbox"/> | <input type="checkbox"/> | <input type="checkbox"/> | <input type="checkbox"/> | <input type="checkbox"/> | <input type="checkbox"/> |  |

**Pain acceptance (continued...)**

**5.6. When my pain increases, I can still take care of my responsibilities** (Please tick one box)

Participant ID No.: \_\_\_\_\_

| <i>Never true</i>        |                          |                          |                          |                          |                          |                          | <i>Always true</i> |                          |
|--------------------------|--------------------------|--------------------------|--------------------------|--------------------------|--------------------------|--------------------------|--------------------|--------------------------|
| 0                        | 1                        | 2                        | 3                        | 4                        | 5                        | 6                        |                    |                          |
| <input type="checkbox"/> | <input type="checkbox"/> | <input type="checkbox"/> | <input type="checkbox"/> | <input type="checkbox"/> | <input type="checkbox"/> | <input type="checkbox"/> |                    | <input type="checkbox"/> |

5.7. I avoid putting myself in situations where my pain might increase (*Please tick one box*)

| <i>Never true</i>        |                          |                          |                          |                          |                          |                          | <i>Always true</i> |                          |
|--------------------------|--------------------------|--------------------------|--------------------------|--------------------------|--------------------------|--------------------------|--------------------|--------------------------|
| 0                        | 1                        | 2                        | 3                        | 4                        | 5                        | 6                        |                    |                          |
| <input type="checkbox"/> | <input type="checkbox"/> | <input type="checkbox"/> | <input type="checkbox"/> | <input type="checkbox"/> | <input type="checkbox"/> | <input type="checkbox"/> |                    | <input type="checkbox"/> |

5.8. My worries and fears about what pain will do to me are true (*Please tick one box*)

| <i>Never true</i>        |                          |                          |                          |                          |                          |                          | <i>Always true</i> |                          |
|--------------------------|--------------------------|--------------------------|--------------------------|--------------------------|--------------------------|--------------------------|--------------------|--------------------------|
| 0                        | 1                        | 2                        | 3                        | 4                        | 5                        | 6                        |                    |                          |
| <input type="checkbox"/> | <input type="checkbox"/> | <input type="checkbox"/> | <input type="checkbox"/> | <input type="checkbox"/> | <input type="checkbox"/> | <input type="checkbox"/> |                    | <input type="checkbox"/> |





Participant ID No.: \_\_\_\_\_

## 15. Confidence

Please indicate how **confident** you are that you can do the following things **at present**, despite the pain, where 0 is 'not at all confident' and 6 is 'completely confident'

\*\* Remember, these questions are not asking whether or not you have been doing these things, but rather how confident you are that you could do them **at present**, despite the pain

### 7.1. I can enjoy things, despite the pain (Please tick one box)

|                          |                          |                          |                          |                             |                          |                          |  |
|--------------------------|--------------------------|--------------------------|--------------------------|-----------------------------|--------------------------|--------------------------|--|
| <b>Not confident</b>     |                          |                          |                          | <b>completely confident</b> |                          |                          |  |
| <b>0</b>                 | <b>1</b>                 | <b>2</b>                 | <b>3</b>                 | <b>4</b>                    | <b>5</b>                 | <b>6</b>                 |  |
| <input type="checkbox"/> | <input type="checkbox"/> | <input type="checkbox"/> | <input type="checkbox"/> | <input type="checkbox"/>    | <input type="checkbox"/> | <input type="checkbox"/> |  |

### 7.2. I can do most household chores (e.g. tidying up, washing dishes etc), despite the pain (Please tick one box)

|                          |                          |                          |                          |                             |                          |                          |  |
|--------------------------|--------------------------|--------------------------|--------------------------|-----------------------------|--------------------------|--------------------------|--|
| <b>Not confident</b>     |                          |                          |                          | <b>completely confident</b> |                          |                          |  |
| <b>0</b>                 | <b>1</b>                 | <b>2</b>                 | <b>3</b>                 | <b>4</b>                    | <b>5</b>                 | <b>6</b>                 |  |
| <input type="checkbox"/> | <input type="checkbox"/> | <input type="checkbox"/> | <input type="checkbox"/> | <input type="checkbox"/>    | <input type="checkbox"/> | <input type="checkbox"/> |  |

### 7.3. I can socialise with my friends or family members as often as I used to, despite the pain (Please tick one box)

|                          |                          |                          |                          |                             |                          |                          |  |
|--------------------------|--------------------------|--------------------------|--------------------------|-----------------------------|--------------------------|--------------------------|--|
| <b>Not confident</b>     |                          |                          |                          | <b>completely confident</b> |                          |                          |  |
| <b>0</b>                 | <b>1</b>                 | <b>2</b>                 | <b>3</b>                 | <b>4</b>                    | <b>5</b>                 | <b>6</b>                 |  |
| <input type="checkbox"/> | <input type="checkbox"/> | <input type="checkbox"/> | <input type="checkbox"/> | <input type="checkbox"/>    | <input type="checkbox"/> | <input type="checkbox"/> |  |

### 7.4. I can cope with my pain in most situations (Please tick one box)

|                          |                          |                          |                          |                             |                          |                          |  |
|--------------------------|--------------------------|--------------------------|--------------------------|-----------------------------|--------------------------|--------------------------|--|
| <b>Not confident</b>     |                          |                          |                          | <b>completely confident</b> |                          |                          |  |
| <b>0</b>                 | <b>1</b>                 | <b>2</b>                 | <b>3</b>                 | <b>4</b>                    | <b>5</b>                 | <b>6</b>                 |  |
| <input type="checkbox"/> | <input type="checkbox"/> | <input type="checkbox"/> | <input type="checkbox"/> | <input type="checkbox"/>    | <input type="checkbox"/> | <input type="checkbox"/> |  |

### 7.5. I can do some form of work, despite the pain ('work' includes housework, paid and unpaid work) (Please tick one box)

|                          |                          |                          |                          |                             |                          |                          |  |
|--------------------------|--------------------------|--------------------------|--------------------------|-----------------------------|--------------------------|--------------------------|--|
| <b>Not confident</b>     |                          |                          |                          | <b>completely confident</b> |                          |                          |  |
| <b>0</b>                 | <b>1</b>                 | <b>2</b>                 | <b>3</b>                 | <b>4</b>                    | <b>5</b>                 | <b>6</b>                 |  |
| <input type="checkbox"/> | <input type="checkbox"/> | <input type="checkbox"/> | <input type="checkbox"/> | <input type="checkbox"/>    | <input type="checkbox"/> | <input type="checkbox"/> |  |

### Confidence (continued...)

### 7.6. I can still do many of the things I enjoy doing, such as hobbies or leisure activity, despite the pain (Please tick one box)



Participant ID No.: \_\_\_\_\_

## 16. Intimate life

### Satisfaction

- 8.1 During the past 4 weeks, how satisfied were you with the frequency of your sexual activity (with or without a partner)?
- Very satisfied  
 Somewhat satisfied  
 Neither satisfied nor dissatisfied  
 Somewhat dissatisfied  
 Very dissatisfied
- 
- 8.2 During the past 4 weeks, how satisfied in general have you been with your ability to have and enjoy sex with/without a partner?
- Very satisfied  
 Somewhat satisfied  
 Neither satisfied nor dissatisfied  
 Somewhat dissatisfied  
 Very dissatisfied  
 I don't have a partner/  
 I don't have sex without a partner

### Orgasm

- 8.3 During the past 4 weeks, when you had sexual activity, how much of the time did you experience orgasm?
- Never  
 Rarely  
 Sometimes  
 Most of the time  
 All of the time  
 I did not have sexual activity
- 
- 8.4 During the past 4 weeks, when you had sexual activity, how much of the time did you feel satisfied after sexual activity?
- Never  
 Rarely  
 Sometimes  
 Most of the time  
 All of the time  
 I did not have sexual activity

*Intimate life (continued...)*

Participant ID No.: \_\_\_\_\_

### Orgasm

- 8.5 During the past 4 weeks, when you experienced orgasm, how strong or intense was the orgasm on average?
- Did not experience any orgasms
- Mild
- Moderate
- Strong

- 8.6 During the past 4 weeks, how much of a problem was difficulty in having an orgasm?
- Not a problem
- Little of a problem
- Somewhat of a problem
- Very much of a problem
- I did not have sexual activity

### Desire

- 8.7 During the past 4 weeks, how much of a problem was lack of sexual interest?
- Not a problem
- Little of a problem
- Somewhat of a problem
- Very much of a problem
- I did not have sexual activity

- 8.8 During the past 4 weeks, how often did you desire sex (with or without a partner?)
- Never
- Once or twice
- 3-4 times
- 5-6 times
- More than 6 times

- 8.9 During the past 4 weeks, how much of a problem was inability to relax and enjoy sex?
- Not a problem
- Little of a problem
- Somewhat of a problem
- Very much of a problem
- I did not have sexual activity

### *Intimate life (continued...)*

#### Pelvic problem interference

Participant ID No.: \_\_\_\_\_

**8.10** During the past 4 weeks, to what extent has your bleeding interfered with your normal or regular sexual activity (with or without a partner)?

- Not at all
- Slightly
- Moderately
- Quite a bit
- Extremely

**8.11** During the past 4 weeks, to what extent has your pelvic pain or discomfort interfered with your normal or regular sexual activity (with or without a partner)?

- Not at all
- Slightly
- Moderately
- Quite a bit
- Extremely

**8.12** During the past 4 weeks, to what extent have your pelvic problems overall interfered with your normal or regular sexual activity (with or without a partner)?

- Not at all
- Slightly
- Moderately
- Quite a bit
- Extremely

## 17. Smartphone app

**9.1.** Did you use the smartphone app for MEMPHIS? (Please tick one box)

Yes

No

Participant ID No.: \_\_\_\_\_

**9.2 If Yes, Do you think you received the new treatment app or the comparison treatment app?**  
*(Please tick one box)*

New treatment app

Comparison treatment app

Don't Know

**THANK YOU FOR FILLING IN THE QUESTIONNAIRE**

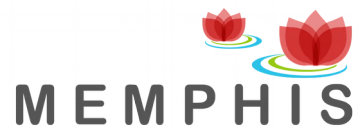

Supplement: resprot_v7i1e8_app2.pdf [file resprot_v7i1e8_app2.pdf]
