# Supplementary material for: Smartphone App Using Mindfulness Meditation for Women With Chronic Pelvic Pain (MEMPHIS): Protocol for a Randomized Feasibility Trial
Source: PubMed Central journal article supplement (PMC5789162; doi:10.2196/resprot.7720), 2018-01-15
Supplement: resprot_v7i1e8_app1.pdf [file resprot_v7i1e8_app1.pdf]

| Changes to the protocol                                                                                                                                                                                                                                                 |
|-------------------------------------------------------------------------------------------------------------------------------------------------------------------------------------------------------------------------------------------------------------------------|
| £5 shopping vouchers were introduced as an incentive for participants to return follow up questionnaires.                                                                                                                                                               |
| Reminder texts were introduced to encourage a high return rate.                                                                                                                                                                                                         |
| The collection of a smaller dataset over the phone was introduced for cases where women were unable to post questionnaires back.                                                                                                                                        |
| An extension of a month was added to the trial timeline to allow enough time for analysis.                                                                                                                                                                              |
| Quality of life scoring subscales used in the analysis were specified as Social functioning, Pain, General Health and Physical functioning using RAND SF-36.                                                                                                            |
| The definition of ' <i>app use</i> ' for the adherence outcome ' <i>Number of days of app use</i> ' was changed from a session that is 50% completed to a session that is 90% completed. This was to correctly reflect the data that is collected from the app company. |
| Participants have been given a chance to answer questions over the phone if they are unable to attend focus groups.                                                                                                                                                     |
